# Supplementary material for: The Evolutionary Rewiring of Ubiquitination Targets Has Reprogrammed the Regulation of Carbon Assimilation in the Pathogenic Yeast Candida albicans
Source: PubMed Central journal article supplement — mBio. 2012 Dec 11;3(6):e00495-12. doi: 10.1128/mBio.00495-12 (PMC3520108; doi:10.1128/mbio.00495-12), 2012-12-11
Supplement: mbo006121395sf01.pdf [file mbo006121395sf01.pdf]

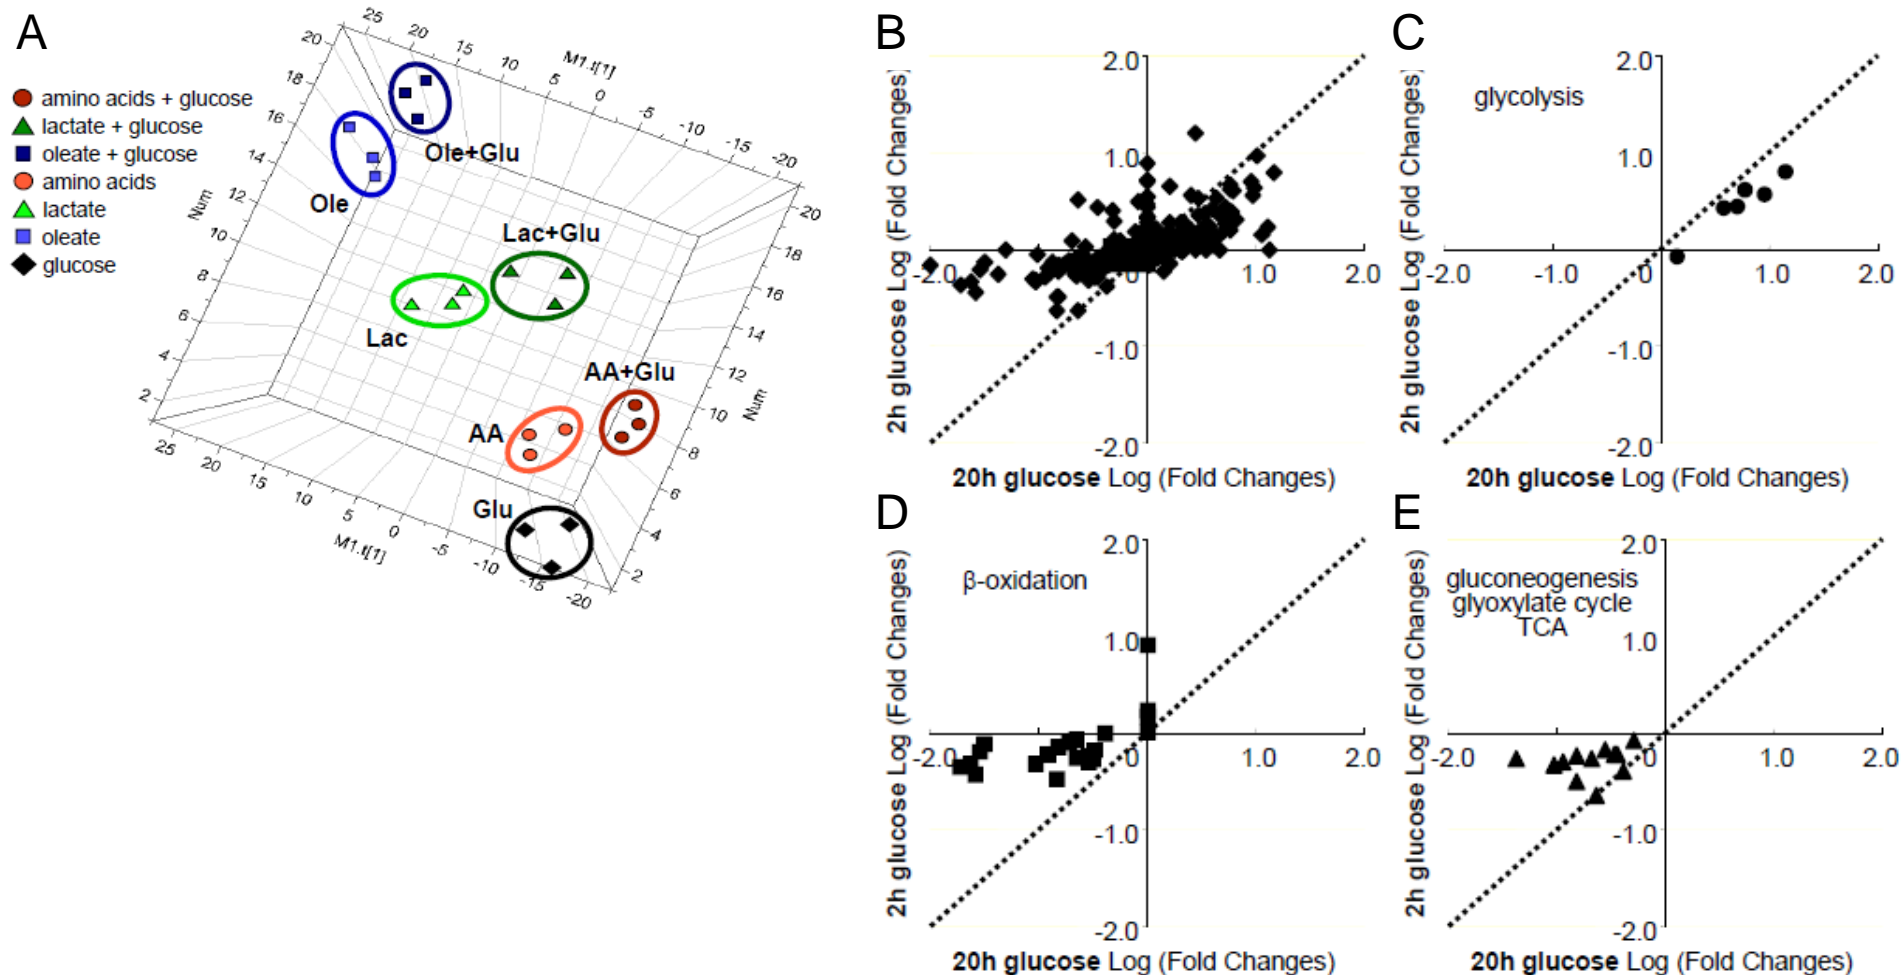

**FIG S1:** (A) Principal Components Analysis confirms the significant impact of carbon source on the *C. albicans* proteome and the reproducibility of the replicate 2D-gel profiles. (B) Correlation between the long term and short effects of glucose on protein levels in *C. albicans* cells grown on oleic acid for all proteins for which changes in expression were detected. (C) Correlation for Glycolytic enzymes. (D) Correlation for fatty acid  $\beta$ -oxidation enzymes. (E) Correlation for gluconeogenic, glyoxylate cycle and TCA cycle enzymes
