# Supplementary material for: The Evolutionary Rewiring of Ubiquitination Targets Has Reprogrammed the Regulation of Carbon Assimilation in the Pathogenic Yeast Candida albicans
Source: PubMed Central journal article supplement — mBio. 2012 Dec 11;3(6):e00495-12. doi: 10.1128/mBio.00495-12 (PMC3520108; doi:10.1128/mbio.00495-12), 2012-12-11
Supplement: mbo006121395sf02.pdf [file mbo006121395sf02.pdf]

**A**

■ Up on glucose  
■ Down on glucose  
 Relative to other C sources

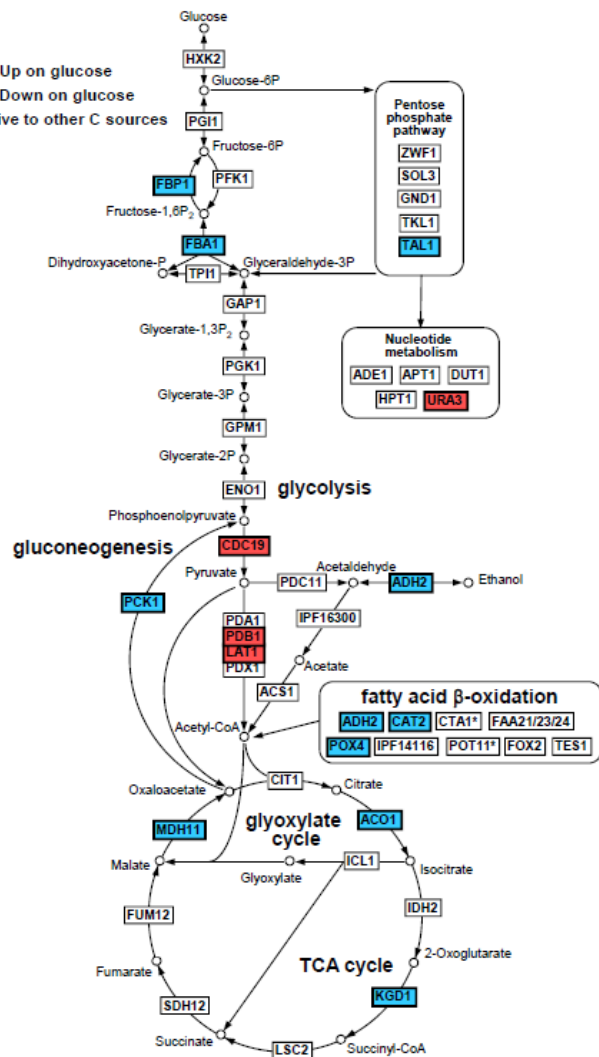

**B**

■ Up on lactate  
■ Down on lactate  
 Relative to glucose

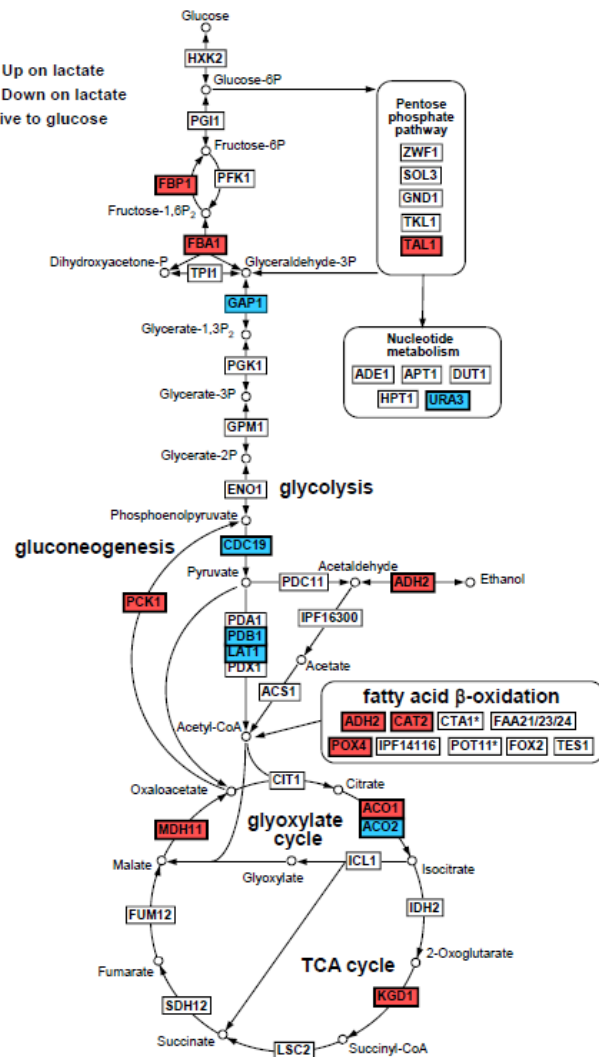

**C**

■ Up on amino acids  
■ Down on amino acids  
 Relative to glucose

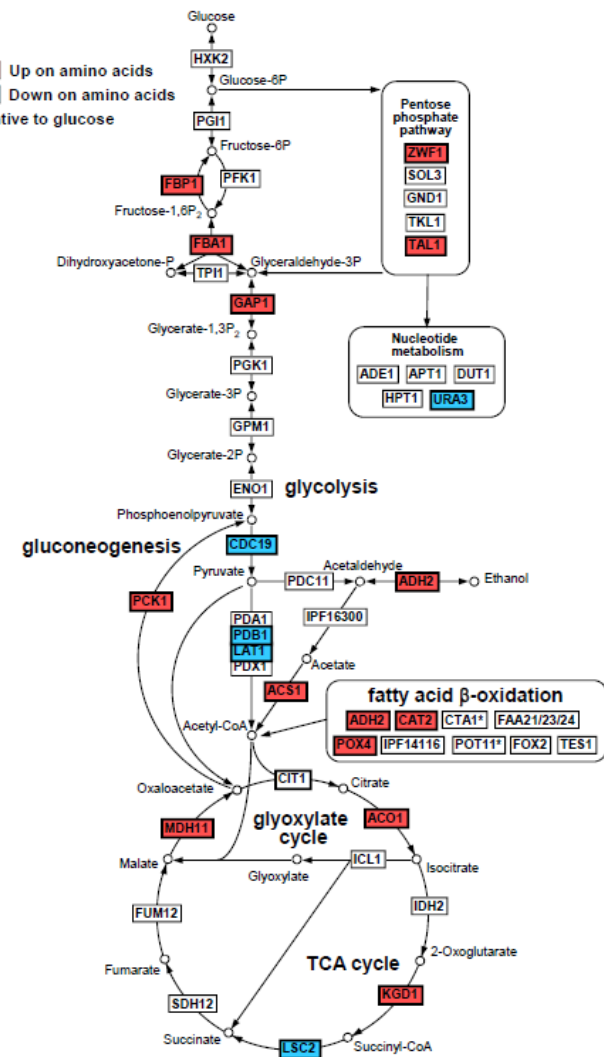

**FIG S2:** Impact of carbon sources on central carbon metabolism in *C. albicans*. **(A)** Glucose. **(B)** Lactate. **(C)** Amino acids.
