# Supplementary material for: The Evolutionary Rewiring of Ubiquitination Targets Has Reprogrammed the Regulation of Carbon Assimilation in the Pathogenic Yeast Candida albicans
Source: PubMed Central journal article supplement — mBio. 2012 Dec 11;3(6):e00495-12. doi: 10.1128/mBio.00495-12 (PMC3520108; doi:10.1128/mbio.00495-12), 2012-12-11
Supplement: mbo006121395sf03.pdf [file mbo006121395sf03.pdf]

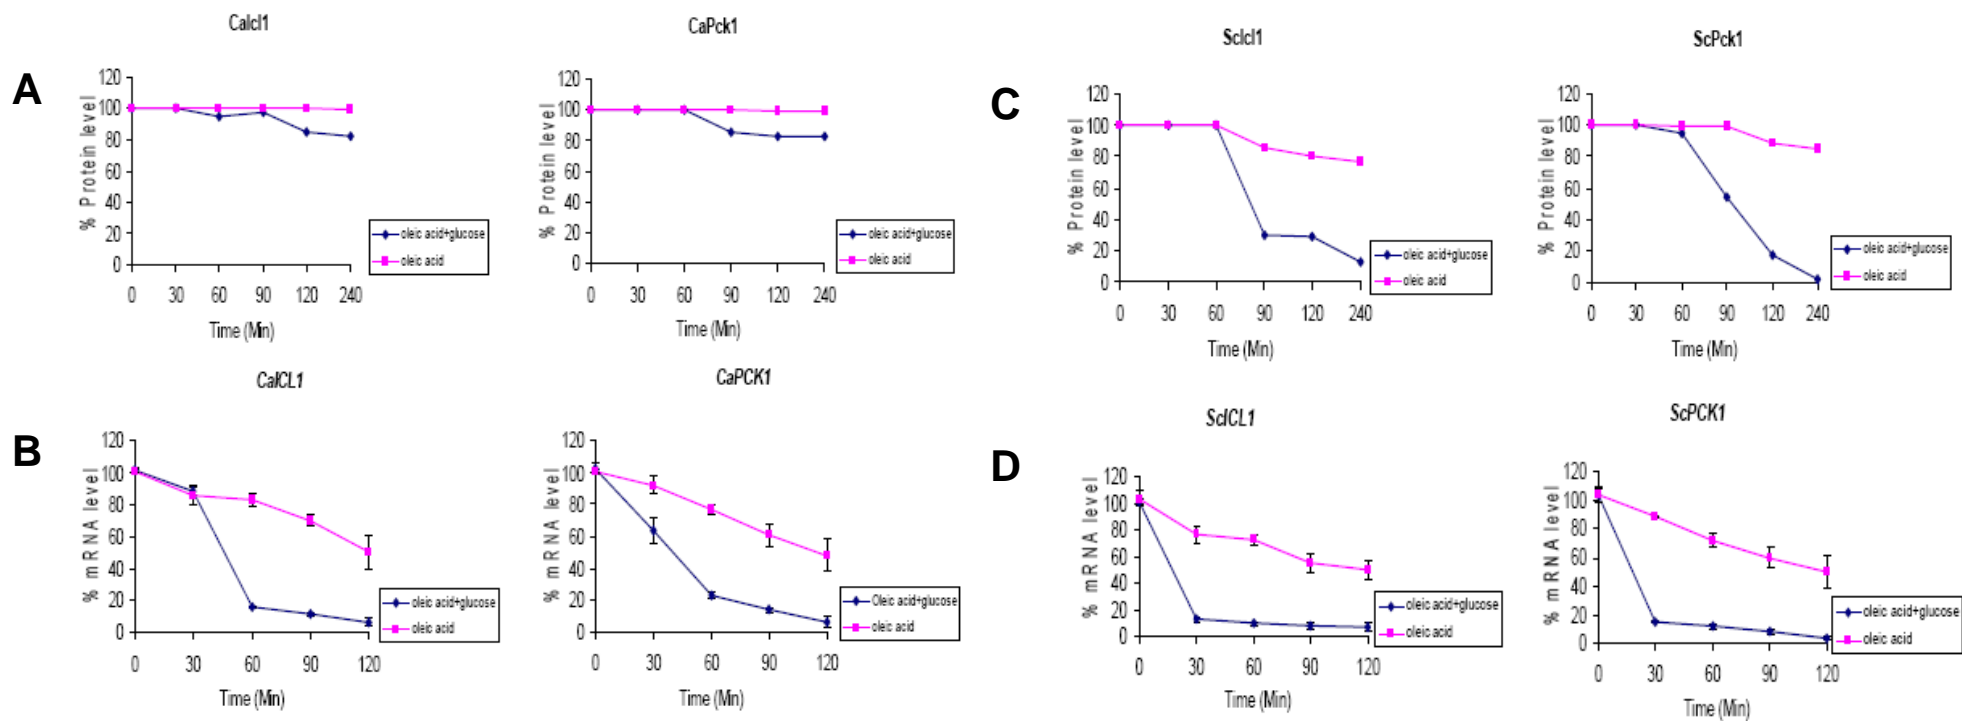

**FIG S3:** Icl1 and Pck1 protein stability and *ICL1* and *PCK1* mRNA turnover in oleic acid-grown *C. albicans* and *S. cerevisiae* following glucose addition. (A) Calcl1-Myc and CaPck1-Myc protein levels, and (B) *CaICL1* and *CaPCK1* mRNA levels after glucose addition to *C. albicans* cells grown on oleic acid. (C) ScIcl1-Myc and ScPck1-HA protein levels, and (D) *ScICL1* and *ScPCK1* mRNA levels after glucose addition to *S. cerevisiae* cells grown on oleic acid. Similar data were obtained from two independent replicate experiments.
