# Supplementary material for: The Evolutionary Rewiring of Ubiquitination Targets Has Reprogrammed the Regulation of Carbon Assimilation in the Pathogenic Yeast Candida albicans
Source: PubMed Central journal article supplement — mBio. 2012 Dec 11;3(6):e00495-12. doi: 10.1128/mBio.00495-12 (PMC3520108; doi:10.1128/mbio.00495-12), 2012-12-11
Supplement: mbo006121395sf04.pdf [file mbo006121395sf04.pdf]

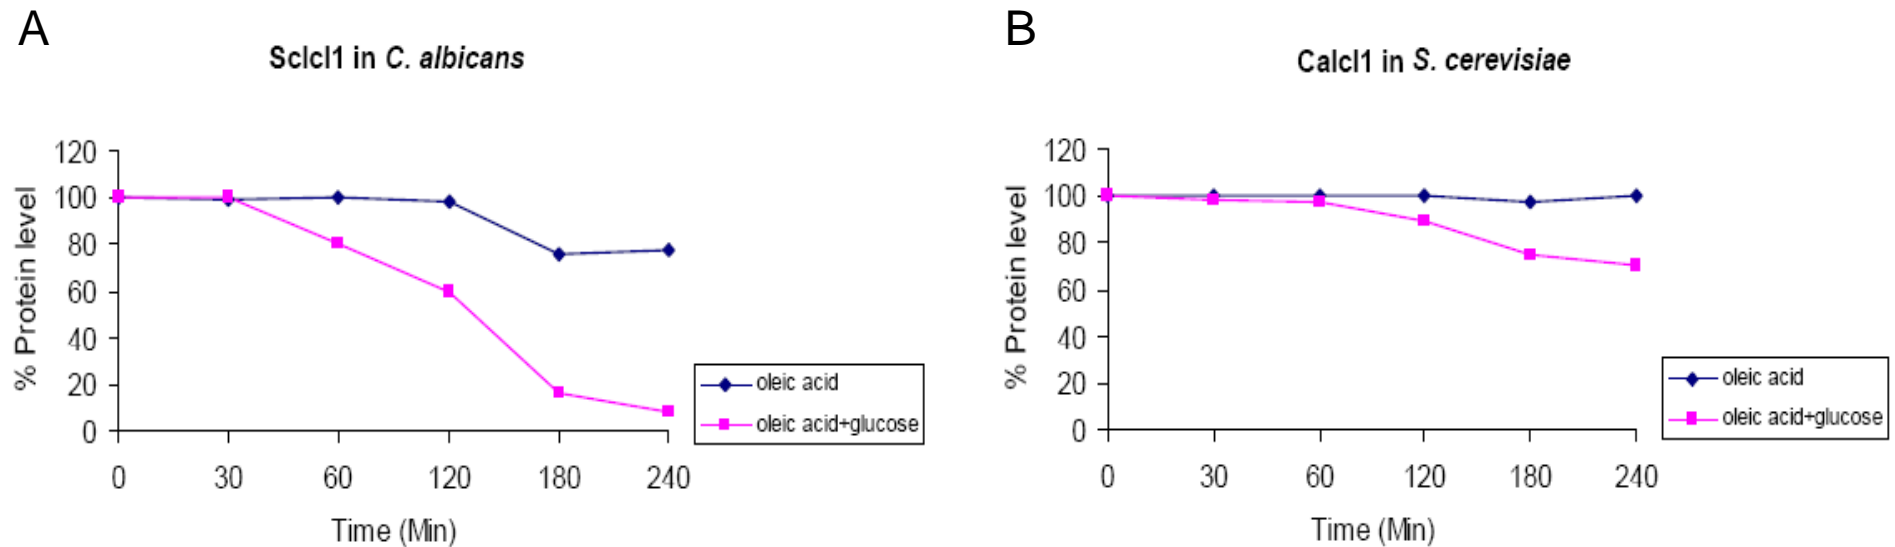

**FIG S4:** Sc1c1 is degraded in *C. albicans*, but Calc1 is stable in *S. cerevisiae*. **(A)** Sc1c1 is rapidly degraded in oleic acid-grown *C. albicans* DSCO1 cells after glucose exposure. Similar data were obtained from two independent replicate experiments. **(B)** Calc1 is stable in oleic acid-grown *S. cerevisiae* DS4-Y40 cells after glucose exposure. Similar data were obtained from two independent replicate experiments.
