# Supplementary material for: The Evolutionary Rewiring of Ubiquitination Targets Has Reprogrammed the Regulation of Carbon Assimilation in the Pathogenic Yeast Candida albicans
Source: PubMed Central journal article supplement — mBio. 2012 Dec 11;3(6):e00495-12. doi: 10.1128/mBio.00495-12 (PMC3520108; doi:10.1128/mbio.00495-12), 2012-12-11
Supplement: mbo006121395sf05.pdf [file mbo006121395sf05.pdf]

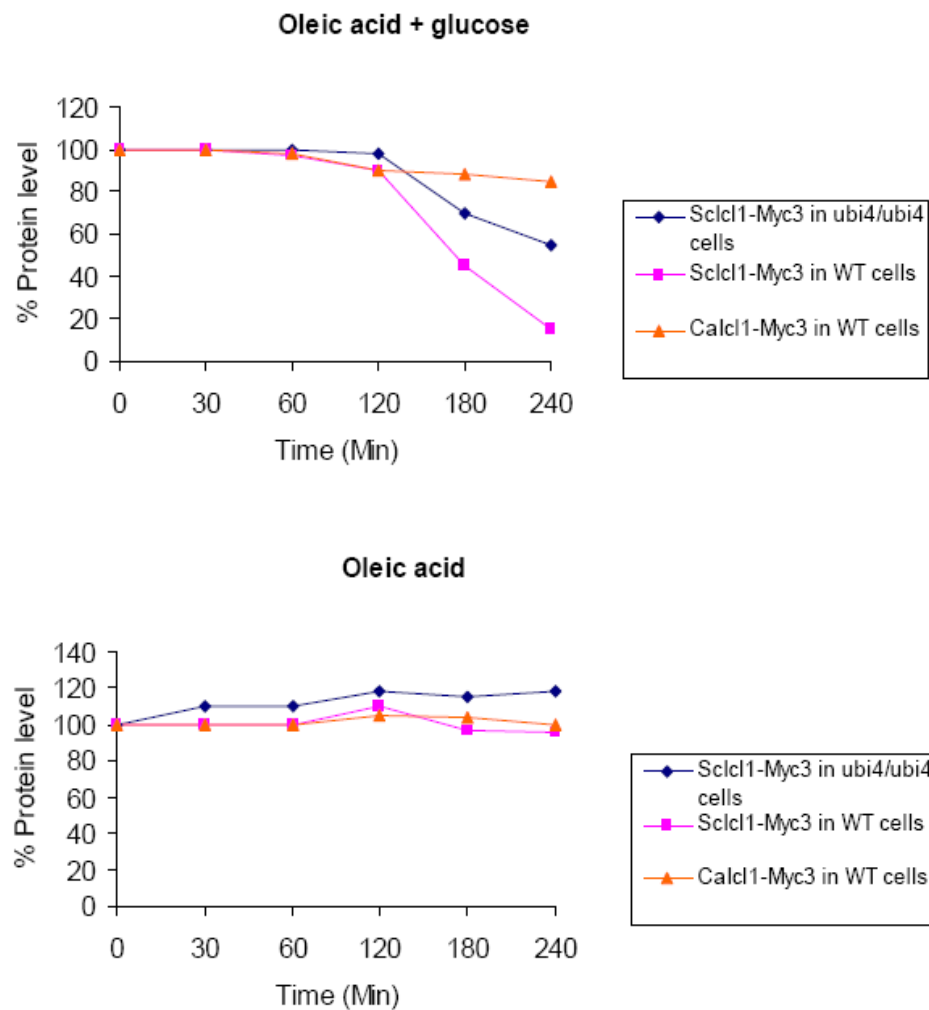

**FIG S5:** Inactivation of polyubiquitin inhibits glucose-accelerated Scicl1 degradation in oleic acid-grown *C. albicans* DSC03 cells. Similar data were obtained from two independent replicate experiments.
