# Supplementary material for: The Evolutionary Rewiring of Ubiquitination Targets Has Reprogrammed the Regulation of Carbon Assimilation in the Pathogenic Yeast Candida albicans
Source: PubMed Central journal article supplement — mBio. 2012 Dec 11;3(6):e00495-12. doi: 10.1128/mBio.00495-12 (PMC3520108; doi:10.1128/mbio.00495-12), 2012-12-11
Supplement: mbo006121395sf06.pdf [file mbo006121395sf06.pdf]

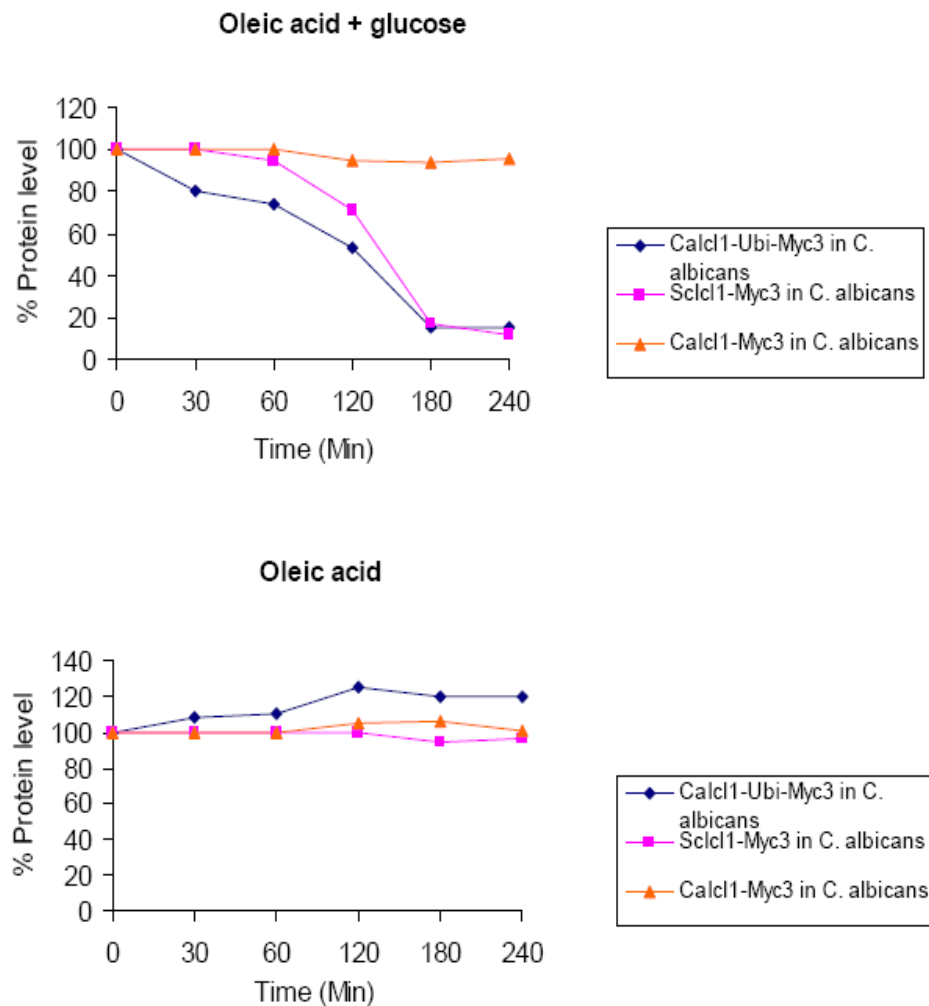

**FIG S6:** Addition of a consensus ubiquitin site stimulates glucose-accelerated degradation of the Calcl1-Ubi-Myc protein in oleic acid-grown *C. albicans*. Similar data were obtained from two independent replicate experiments.
