# Supplementary material for: The Evolutionary Rewiring of Ubiquitination Targets Has Reprogrammed the Regulation of Carbon Assimilation in the Pathogenic Yeast Candida albicans
Source: PubMed Central journal article supplement — mBio. 2012 Dec 11;3(6):e00495-12. doi: 10.1128/mBio.00495-12 (PMC3520108; doi:10.1128/mbio.00495-12), 2012-12-11
Supplement: mbo006121395st1.pdf [file mbo006121395st1.pdf]

Table S1. Strains used in this study

| Strain                      | Genotype                                                                                                                                                           | Source                      |
|-----------------------------|--------------------------------------------------------------------------------------------------------------------------------------------------------------------|-----------------------------|
| <b><i>C. albicans</i></b>   |                                                                                                                                                                    |                             |
| SC5314                      | Clinical isolate                                                                                                                                                   | Gillum <i>et al.</i> (1984) |
| CAI4                        | <i>ura3Δ::λimm434/ura3Δ::λimm434</i>                                                                                                                               | Fonzi and Irwin (1993)      |
| RM1000                      | <i>ura3Δ::λimm434/ura3Δ::λimm434, his1::hisG/his1::hisG</i>                                                                                                        | Wilson <i>et al.</i> (1999) |
| BWP17                       | <i>ura3Δ::λimm434/ura3Δ::λimm434, his1::hisG/his1::hisG, arg4Δ::hisG/arg4::hisG</i>                                                                                | Wilson <i>et al.</i> (1999) |
| NGY152                      | <i>ura3Δ::λimm434/ura3Δ::λimm434, Clp10-URA3</i>                                                                                                                   | Walker <i>et al.</i> (2009) |
| CA510                       | <i>ura3Δ::λimm434/ura3Δ::λimm434, his1::hisG/his1::hisG, icl1::loxP-HIS1-loxP/ICL1</i>                                                                             | Manson, unpublished         |
| CA517                       | <i>ura3Δ::λimm434/ura3Δ::λimm434, his1::hisG/his1::hisG, icl1::loxP-HIS1-loxP/icl1::loxP-URA3-loxP</i>                                                             | Manson, unpublished         |
| CA674                       | <i>ura3Δ::λimm434/ura3Δ::λimm434 his1::hisG/his1::hisG, Clp-20-URA3</i>                                                                                            | Smith <i>et al.</i> (2004)  |
| CA1395                      | <i>ura3Δ::λimm434/ura3Δ::λimm434, his1::hisG/his1::hisG, ICL1/ICL1-Myc<sub>3</sub>-URA3</i>                                                                        | This study                  |
| CA1431                      | <i>ura3Δ::λimm434/ura3Δ::λimm434, his1::hisG/his1::hisG, PCK1/PCK1-Myc<sub>3</sub>-URA3</i>                                                                        | This study                  |
| MLC40                       | <i>ura3Δ::λimm434/ura3Δ::λimm434 his1::hisG/his1::hisG arg4Δ::hisG/arg4::hisG, ubi4::loxP-URA3-loxP/ubi4::loxP-ARG4-loxP</i>                                       | Leach <i>et al.</i> 2011    |
| DSCO                        | <i>ura3Δ::λimm434/ura3Δ::λimm434 his1::hisG/his1::hisG, arg4Δ::hisG/arg4::hisG, ubi4Δ::loxP/ubi4Δ::loxP-ARG4-loxP</i>                                              | This study                  |
| DSCO1                       | <i>ura3Δ::λimm434/ura3Δ::λimm434 his1::hisG/his1::hisG, CalICL1/CalICL1p-ScICL1-Myc<sub>3</sub>-URA3</i>                                                           | This study                  |
| DSCO2                       | <i>ura3Δ::λimm434/ura3Δ::λimm434 his1::hisG/his1::hisG, Caicl1/CalICL1p-ScICL1-Myc<sub>3</sub>-URA3</i>                                                            | This study                  |
| DSCO3                       | <i>ura3Δ::λimm434/ura3Δ::λimm434 his1::hisG/his1::hisG, arg4Δ::hisG/arg4::hisG, ubi4Δ::loxP/ubi4Δ::loxP-ARG4-loxP CalICL1/CalICL1p-ScICL1-Myc<sub>3</sub>-URA3</i> | This study                  |
| DSCO4                       | <i>ura3Δ::λimm434/ura3Δ::λimm434 his1::hisG/his1::hisG, CalICL1/CalICL1-Ubi-Myc<sub>3</sub>-URA3</i>                                                               | This study                  |
| <b><i>S. cerevisiae</i></b> |                                                                                                                                                                    |                             |
| W303-1Ba                    | <i>MATα, ade2, his3, leu2, trp1, ura3</i>                                                                                                                          | Euroscarf                   |
| BY4743                      | <i>MATα/α, his3/his3, leu2/leu2, lys2/LYS2, MET15/met15, ura3/ura3</i>                                                                                             | Euroscarf                   |
| Y30202                      | <i>MATα/α, his3/his3, leu2/leu2, lys2/LYS2, MET15/met15, ura3/ura3, icl1/icl1</i>                                                                                  | Euroscarf                   |
| DS1-W10                     | W303-1Ba, pYM21                                                                                                                                                    | This study                  |
| DS2-W20                     | W303-1Ba, pYM3                                                                                                                                                     | This study                  |
| DS3-Y30                     | <i>MATα/α, his3/his3, leu2leu2, lys2/LYS2, MET15/met15, ura3/ura3, ICL1/ICL1-Myc<sub>3</sub>-URA3</i>                                                              | This study                  |
| DS4-Y40                     | <i>MATα/α, his3/his3, leu2leu2, lys2/LYS2, MET15/met15, ura3/ura3, ICL1/ScICL1p-CalICL1-Myc<sub>3</sub>-URA3</i>                                                   | This study                  |

Euroscarf: <http://web.uni-frankfurt.de/fb15/mikro/euroscarf/>

Fonzi, W.A. and Irwin, M.Y. (1993) Isogenic strain construction and gene mapping in *Candida albicans*. *Genetics* **134**: 717-728.

Gillum, A.M., Tsay, E.Y., Kirsch, D.R., 1984. Isolation of the *Candida albicans* gene for orotidine-5'-phosphate decarboxylase by complementation of *S. cerevisiae ura3* and *E. coli pyrF* mutations. *Molec. Gen. Genet.*, 198: 179-182.

Leach, M.D., Stead, D.A., Argo, E., MacCallum, D.M. and Brown, A.J.P. (2011) Proteomic and molecular analyses highlight the importance of ubiquitination for stress resistance, metabolic adaptation, morphogenetic regulation and virulence of *Candida albicans*. *Molec. Microbiol.* 79, 1574-1593.

Walker, L.A., MacCallum, D.M., Bertram, G., Gow, N.A.R., Odds, F.C. and Brown, A.J.P. (2009) Genome-wide analysis of *Candida albicans* gene expression patterns during infection of the mammalian kidney. *Fungal Genetics & Biology*, 46, 210-219.

Wilson, R.B., Davis, D., and Mitchell, A.P. (1999). Rapid hypothesis testing with *Candida albicans* through gene disruption with short homology regions. *J. Bacteriol.* **181**, 1868-1874.
