# Supplementary material for: The Evolutionary Rewiring of Ubiquitination Targets Has Reprogrammed the Regulation of Carbon Assimilation in the Pathogenic Yeast Candida albicans
Source: PubMed Central journal article supplement — mBio. 2012 Dec 11;3(6):e00495-12. doi: 10.1128/mBio.00495-12 (PMC3520108; doi:10.1128/mbio.00495-12), 2012-12-11
Supplement: mbo006121395st2.pdf [file mbo006121395st2.pdf]

**Table S2: List of changes in the *C. albicans* proteome detected in response to alterations in carbon source**

| Spot Number | Protein       | Accession Number | S | Function          | Mass (kDa) | pI      | Glucose |        | Amino Acids |       |          | Amino Acids + Glu |        |        | Norm    | Vol (SD) |          |         |         |
|-------------|---------------|------------------|---|-------------------|------------|---------|---------|--------|-------------|-------|----------|-------------------|--------|--------|---------|----------|----------|---------|---------|
|             |               |                  |   |                   |            |         | Norm    | SD     | Norm        | SD    | Fold Dif | T-test            | Norm   | SD     |         |          | Fold Dif | T-test  |         |
| 1090        | Acb1          | CA5225           | 8 | Acyl-coenzyme J   | unknown    | unknown | 0.272   | 0.075  | 0.435       | 0.1   | 1.60     | 0.153             | 0.361  | 0.1    | 1.33    | 0.379    | 0.221    | 0.06    |         |
| 90          | Aco1 1        | CA3546           | 4 | Aconitate hydr    | 84.2       | 6.4     | < 0.01  |        | < 0.01      |       | na       | -                 | < 0.01 |        | na      | -        | 0.016    | 0.003 > |         |
| 99          | Aco1 2        | CA3546           | 1 | aconitate hydr    | 84.2       | 6.4     | < 0.01  |        | 0.122       | 0     | 12.20    | na                | 0.106  | 0      | > 10.60 | na       | 0.125    | 0.001 > |         |
| 113         | Aco1 3        | CA3546           | 1 | aconitate hydr    | 84.2       | 6.4     | 0.494   | 0.111  | 1.364       | 0.2   | 2.76     | 0.002             | 1.223  | 0.1    | 2.48    | 0.001    | 1.384    | 0.108   |         |
| 105         | Aco2          | CA4077           | 6 | aconitate hydr    | 85.9       | 5.7     | 0.021   | 0.005  | < 0.01      |       | < 0.48   | na                | 0.052  | 0      | 2.48    | 0.381    | 0.017    | 0.004   |         |
| 149         | Acs1          | CA0848           | 4 | Acetyl-coenzyn    | 75.1       | 6.3     | < 0.01  |        | < 0.01      |       | na       | -                 | < 0.01 |        | na      | -        | 0.075    | 0.057 > |         |
| 851         | Ade1          | CA5829           | 8 | PR-amidoimid      | 32.9       | 5.1     | 0.157   | 0.012  | 0.214       | 0     | 1.36     | 0.01              | 0.242  | 0      | 1.54    | 0.005    | 0.117    | 0.017   |         |
| 640         | Adh2 1        | CA3923           | 1 | alcohol dehydr    | 36.8       | 6.7     | 0.023   | 0.004  | 0.304       | 0     | 13.22    | 1.35E-04          | 0.183  | 0      | 7.96    | 0.009    | 2.891    | 0.175   |         |
| 948         | Adh2 2        | CA3923           | 4 | alcohol dehydr    | 36.8       | 6.7     | < 0.01  |        | < 0.01      |       | na       | -                 | < 0.01 |        | na      | -        | 0.028    | 0.004 > |         |
| 106         | Afg2          | CA5106           | 5 | Member of the     | 83.1       | 5.2     | < 0.01  |        | < 0.01      |       | na       | -                 | 0.017  | 0      | > 1.70  | na       | < 0.01   |         |         |
| 559         | Apr1          | CA4476           | 2 | Aspartyl protea   | 45.4       | 4.4     | 0.06    | 0.003  | < 0.01      |       | < 0.17   | na                | < 0.01 |        | < 0.17  | na       | < 0.01   | <       |         |
| 1000        | Apt1          | CA4551           | 8 | Adenine phosp     | 20.9       | 5.0     | 0.058   | 0.002  | 0.081       | 0     | 1.40     | 0.003             | 0.132  | 0      | 2.28    | 0.002    | 0.041    | 0.003   |         |
| 708         | Ara1          | CA3746           | 6 | D-arabinose de    | 37.4       | 5.7     | 0.041   | 0.004  | < 0.01      |       | < 0.24   | na                | < 0.01 |        | < 0.24  | na       | 0.058    | 0.002   |         |
| 871         | Ard8          | CA3288           | 2 | D-arabinitol del  | 30.7       | 5.7     | 0.12    | 0.013  | 0.059       | 0     | 0.49     | 0.015             | 0.107  | 0      | 0.89    | 0.187    | 0.04     | 0.01    |         |
| 657         | Arg5,6 1      | CA2836           | 6 | acetylglutam      | 95.1       | 7.6     | 0.215   | 0.039  | < 0.01      |       | < 0.05   | na                | < 0.01 |        | < 0.05  | na       | 0.047    | 0.003   |         |
| 659         | Arg5,6 2      | CA2836           | 6 | acetylglutam      | 95.1       | 7.6     | 0.031   | 0.016  | < 0.01      |       | < 0.32   | na                | < 0.01 |        | < 0.32  | na       | 0.059    | 0.051   |         |
| 371         | Aro8          | CA4804           | 5 | aromatic amin     | 54.7       | 6.1     | 0.042   | 0.007  | 0.043       | 0     | 1.02     | 0.948             | 0.035  | 0      | 0.83    | 0.411    | 0.058    | 0.013   |         |
| 579         | Arp2          | CA5532           | 4 | actin-like protei | 43.9       | 6.5     | < 0.01  |        | < 0.01      |       | na       | -                 | < 0.01 |        | na      | -        | 0.051    | 0.001 > |         |
| 255         | Asn1          | CA3616           | 5 | asparagine syn    | 64.6       | 6.0     | 0.05    | 0.003  | 0.071       | 0     | 1.42     | 0.118             | 0.073  | 0      | 1.46    | 0.015    | 0.074    | 0.006   |         |
| 428         | Atp2 1        | CA4362           | 7 | F1F0-ATPase       | 55.7       | 4.7     | 1.949   | 0.093  | 1.6         | 0.3   | 0.82     | 0.16              | 1.883  | 0.1    | 0.97    | 0.543    | 0.739    | 0.183   |         |
| 437         | Atp2 2        | CA4362           | 5 | F1F0-ATPase       | 55.7       | 4.7     | < 0.01  |        | < 0.01      |       | na       | -                 | < 0.01 |        | na      | -        | < 0.01   |         |         |
| 613         | Bat21         | CA0330           | 2 | branched-chair    | 43.9       | 7.6     | 0.129   | 0.035  | 0.06        | 0     | 0.47     | 0.03              | 0.075  | 0      | 0.58    | 0.063    | 0.059    | 0.012   |         |
| 809         | Cap2          | CA5159           | 2 | F-actin capping   | 32.9       | 4.2     | 0.046   | 0.005  | < 0.01      |       | < 0.22   | na                | < 0.01 |        | 0.22    | na       | < 0.01   | <       |         |
| 250         | Cat2 1        | CA5152           | 1 | carnitine O-ace   | 71.4       | 7.0     | < 0.01  |        | 0.018       | 0     | > 1.80   | na                | < 0.01 |        | na      | -        | 0.097    | 0.009   |         |
| 263         | Cat2 2        | CA5152           | 1 | carnitine O-ace   | 71.4       | 7.0     | 0.012   | 0.003  | 0.031       | 0     | 2.58     | 0.019             | < 0.01 |        | < 0.83  | na       | 0.12     | 0.018   |         |
| 664         | Cat2 3 + Pox4 | CA5152           | 5 | carnitine O-ace   | 71.4       | 7.0     | < 0.01  |        | < 0.01      |       | na       | -                 | < 0.01 |        | na      | -        | < 0.01   |         |         |
| 318         | Cct7          | CA2480           | 8 | component of c    | 60.4       | 4.9     | 0.016   | 0.003  | 0.033       | 0     | 2.06     | 0.05              | 0.051  | 0      | 3.19    | 0.011    | 0.023    | 0.005   |         |
| 499         | Cdc11         | CA2610           | 4 | septin (BH)       | 46.7       | 4.7     | < 0.01  |        | < 0.01      |       | na       | -                 | < 0.01 |        | na      | -        | 0.017    | 0       |         |
| 269         | Cdc19 1       | CA3483           | 8 | pyruvate kinase   | 55.4       | 7.0     | 0.03    | 0.002  | 0.026       | 0     | 0.87     | 0.647             | 0.041  | 0      | 1.37    | 0.05     | 0.051    | 0.004   |         |
| 284         | Cdc19 2       | CA3483           | 8 | pyruvate kinase   | 55.4       | 7.0     | 0.039   | 0.013  | 0.022       | 0     | 0.56     | 0.353             | 0.013  | 0      | 0.33    | 0.068    | 0.018    | 0.001   |         |
| 424         | Cdc19 3       | CA3483           | 2 | pyruvate kinase   | 55.4       | 7.0     | 0.062   | 0.045  | < 0.01      |       | < 0.16   | na                | < 0.01 |        | < 0.16  | na       | < 0.01   | <       |         |
| 500         | Cit1 1        | CA3909           | 5 | citrate synthase  | 52.0       | 7.6     | 0.093   | 0.006  | 0.097       | 0     | 1.04     | 0.507             | 0.11   | 0      | 1.18    | 0.238    | 0.121    | 0.064   |         |
| 635         | Cit1 2        | CA3909           | # | citrate synthase  | 52.0       | 7.6     | < 0.01  |        | < 0.01      |       | na       | -                 | < 0.01 |        | na      | -        | < 0.01   |         |         |
| 700         | Cit1 3        | CA3909           | 5 | citrate synthase  | 52.0       | 7.6     | < 0.01  |        | < 0.01      |       | na       | -                 | < 0.01 |        | na      | -        | < 0.01   |         |         |
| 1044        | Cof1          | CA5409           | 8 | cofilin (BH) Bu   | J          | unknown | unknown | 0.435  | 0.052       | 0.505 | 0.1      | 1.16              | 0.291  | 0.643  | 0       | 1.48     | 0.017    | 0.409   | 0.065   |
| 1040        | Cox4          | CA4533           | 3 | cytochrome-c c    | 17.3       | 8.8     | 0.225   | 0.037  | 0.48        | 0.1   | 2.13     | 0.028             | 0.355  | 0.1    | 1.58    | 0.043    | 0.202    | 0.036   |         |
| 1085        | Cox6.3f       | CA4692           | # | cytochrome-c c    | J          | unknown | unknown | 0.193  | 0.051       | 0.3   | 0        | 1.55              | 0.041  | 0.307  | 0       | 1.59     | 0.041    | 0.057   | 0.022   |
| 7           | Cpa2          | CA0687           | 6 | Arginine-specif   | 46.9       | 6.9     | 0.089   | 0.004  | < 0.01      |       | < 0.11   | na                | < 0.01 |        | < 0.11  | na       | 0.057    | 0.016   |         |
| 101         | Crn1          | CA4941+CA4949    | 1 | actin-binding p   | J          | unknown | unknown | < 0.01 |             | 0.023 | 0        | > 2.30            | na     | < 0.01 |         | na       | -        | 0.028   | 0.005 < |

|      |               |             |    |                   |              |        |        |       |        |     |         |          |        |        |         |          |        |       |   |
|------|---------------|-------------|----|-------------------|--------------|--------|--------|-------|--------|-----|---------|----------|--------|--------|---------|----------|--------|-------|---|
| 884  | Cta1          | CA3011      | 5  | catalase A, per   | 54.9         | 6.7    | < 0.01 |       | < 0.01 | na  | -       | < 0.01   | na     | -      | < 0.01  |          |        |       |   |
| 205  | Cyb3          | CA5263      | 4  | Lactate dehydr    | 62.9         | 4.8    | < 0.01 |       | < 0.01 | na  | -       | 0.063    | 0      | > 6.30 | na      | 0.2      | 0.139  | >     |   |
| 1021 | Cyp51         | CA5717      | 8  | Cyclophilin - pe  | 23.4         | 5.7    | 0.15   | 0.014 | 0.151  | 0   | 1.01    | 0.971    | 0.159  | 0      | 1.06    | 0.595    | 0.124  | 0.031 |   |
| 291  | Dak2          | CA0776      | 1  | dihydroxyaceto    | 65.0         | 5.1    | < 0.01 |       | 0.031  | 0   | > 3.10  | na       | 0.01   |        | na      | -        | 0.042  | 0.035 | > |
| 776  | Dot5          | CA5773      | 1  | Derepression c    | 29.1         | 4.6    | < 0.01 |       | 0.06   | 0   | > 6.00  | na       | 0.034  | 0      | > 3.40  | na       | 0.117  | 0.008 | > |
| 675  | Dsk2          | CA5503      | 2  | ubiquitin-like pr | 35.9         | 4.7    | 0.207  | 0.03  | 0.101  | 0   | 0.49    | 0.029    | 0.168  | 0      | 0.81    | 0.107    | 0.053  | 0.011 |   |
| 1025 | Dut1          | CA4627      | 8  | dUTP pyrophos     | 16.9         | 5.7    | 0.062  | 0.011 | 0.086  | 0   | 1.39    | 0.087    | 0.105  | 0      | 1.69    | 0.036    | 0.075  | 0.016 |   |
| 644  | Dys1          | CA4008      | 2  | deoxyhypusine     | 41.6         | 5.5    | 0.15   | 0.031 | 0.04   | 0   | 0.27    | 0.027    | < 0.01 |        | < 0.07  | na       | 0.017  | 0.001 |   |
| 525  | Ebp7          | CA2227      | #  | NADPH DEHYD       | 43.8         | 4.9    | < 0.01 |       | < 0.01 |     | na      | -        | < 0.01 |        | na      | -        | 0.046  | 0.048 | > |
| 429  | Eft2          | orf19.5788  | 5  | Elongation Fac    | Jnknownknov  | < 0.01 |        |       | < 0.01 |     | na      | -        | < 0.01 |        | na      | -        | < 0.01 |       |   |
| 966  | Egd2          | CA2956      | 8  | Nascent polype    | 19.5         | 4.4    | 0.082  | 0.022 | 0.076  | 0   | 0.93    | 0.678    | 0.09   | 0      | 1.10    | 0.697    | 0.078  | 0.06  |   |
| 505  | Eno1          | CA3874      | 8  | Enolase I (2-ph   | 47.2         | 5.5    | 0.145  | 0.003 | 0.024  | 0   | 0.17    | 4.59E-04 | 0.047  | 0      | 0.32    | 5.09E-04 | 0.05   | 0.031 |   |
| 473  | Erg13         | CA5549      | 8  | 3-hydroxy-3-m     | 49.8         | 5.8    | 0.035  | 0.001 | 0.033  | 0   | 0.94    | 0.723    | 0.041  | 0      | 1.17    | 0.09     | 0.026  | 0.003 |   |
| 615  | Erg6          | CA4005      | 1, | sterol transmet   | 43.1         | 6.0    | 0.041  | 0.016 | 0.11   | 0   | 2.68    | 0.01     | 0.105  | 0      | 2.56    | 0.049    | 0.133  | 0.025 |   |
| 75   | Faa21 1       | CA1596      | 5  | long-chain-fatty  | 80.3         | 6.6    | < 0.01 |       | < 0.01 |     | na      | -        | < 0.01 |        | na      | -        | < 0.01 |       |   |
| 128  | Faa21 2       | CA1596      | 5  | long-chain-fatty  | 80.3         | 6.6    | < 0.01 |       | < 0.01 |     | na      | -        | < 0.01 |        | na      | -        | < 0.01 |       |   |
| 134  | Faa21 3       | CA1596      | #  | long-chain-fatty  | 80.3         | 6.6    | < 0.01 |       | < 0.01 |     | na      | -        | < 0.01 |        | na      | -        | < 0.01 |       |   |
| 138  | Faa21 4       | CA1596      | 5  | long-chain-fatty  | 80.3         | 6.6    | < 0.01 |       | < 0.01 |     | na      | -        | < 0.01 |        | na      | -        | < 0.01 |       |   |
| 214  | Faa21 5       | CA1596      | 5  | long-chain-fatty  | 80.3         | 6.6    | < 0.01 |       | < 0.01 |     | na      | -        | < 0.01 |        | na      | -        | < 0.01 |       |   |
| 304  | Faa21 6       | CA1596      | 5  | long-chain-fatty  | 80.3         | 6.6    | < 0.01 |       | < 0.01 |     | na      | -        | < 0.01 |        | na      | -        | < 0.01 |       |   |
| 123  | Faa23         | CA4311      | 5  | Long-chain-fatt   | 80.4         | 7.1    | < 0.01 |       | < 0.01 |     | na      | -        | < 0.01 |        | na      | -        | < 0.01 |       |   |
| 103  | Faa24 1       | CA5293      | 5  | Long-chain-fatt   | 83.1         | 6.4    | < 0.01 |       | < 0.01 |     | na      | -        | < 0.01 |        | na      | -        | 0.019  | 0.008 |   |
| 109  | Faa24 2       | CA5293      | 5  | Long-chain-fatt   | 83.1         | 6.4    | < 0.01 |       | < 0.01 |     | na      | -        | < 0.01 |        | na      | -        | < 0.01 |       |   |
| 717  | Fba1 + Fbp1 2 | CA5180      | 1  | fructose-bisphc   | 39.2         | 6.0    | < 0.01 |       | 0.059  | 0   | > 5.90  | na       | 0.068  | 0      | > 6.80  | na       | 0.104  | 0.014 |   |
| 705  | Fbp1 1        | CA3199      | 1  | fructose-1,6-bis  | 35.9         | 6.2    | < 0.01 |       | 0.165  | 0   | > 16.50 | na       | 0.12   | 0      | > 12.00 | na       | 0.352  | 0.048 |   |
| 225  | Fox2          | CA0347      | 5  | hydratase-dehy    | 99.4         | 5.1    | < 0.01 |       | < 0.01 |     | na      | -        | < 0.01 |        | na      | -        | < 0.01 |       |   |
| 430  | Fum12 1       | CA4349+CA43 | 5  | Fumarate hydr     | Jnknownknown | 0.066  | 0.009  |       | 0.054  | 0   | 0.82    | 0.214    | 0.066  | 0      | 1.00    | 0.977    | 0.051  | 0.004 |   |
| 436  | Fum12 2       | CA4349+CA43 | 5  | Fumarate hydr     | Jnknownknown | 0.336  | 0.05   |       | 0.249  | 0.2 | 0.74    | 0.478    | 0.273  | 0      | 0.81    | 0.191    | 0.22   | 0.018 |   |
| 791  | Gap1 1        | CA5892      | 4  | Glyceraldehyde    | 35.8         | 7.1    | 0.165  | 0.077 | 0.234  | 0.1 | 1.42    | 0.362    | < 0.01 |        | < 0.06  | na       | 0.385  | 0.076 |   |
| 796  | Gap1 2        | CA5892      | 6, | Glyceraldehyde    | 35.8         | 7.1    | 0.098  | 0.005 | 0.019  | 0   | 0.19    | 3.79E-04 | 0.042  | 0      | 0.43    | 2.18E-04 | 0.077  | 0.007 |   |
| 990  | Gdh3          | CA1579      | 2  | NADP-glutama      | 49.6         | 5.6    | 0.066  | 0.028 | < 0.01 |     | < 0.15  | na       | < 0.01 |        | < 0.15  | na       | < 0.01 |       | < |
| 862  | Glo2          | CA4332      | 4  | Glyoxalase II (l  | 30.7         | 6.8    | < 0.01 |       | < 0.01 |     | na      | -        | < 0.01 |        | na      | -        | 0.041  | 0.001 |   |
| 159  | Gnd1 1        | CA5239      | 5  | 6-phosphogluc     | 56.9         | 6.5    | < 0.01 |       | < 0.01 |     | na      | -        | < 0.01 |        | na      | -        | < 0.01 |       |   |
| 456  | Gnd1 2        | CA5239      | 5  | 6-phosphogluc     | 56.9         | 6.5    | < 0.01 |       | < 0.01 |     | na      | -        | < 0.01 |        | na      | -        | < 0.01 |       |   |
| 1048 | Gpx1 1        | CA0559      | 5  | glutathione per   | 18.1         | 7.2    | 0.134  | 0.033 | 0.066  | 0   | 0.49    | 0.071    | 0.072  | 0      | 0.54    | 0.046    | 0.084  | 0.003 |   |
| 1056 | Gpx1 2        | CA0559      | 5  | glutathione per   | 18.1         | 7.2    | < 0.01 |       | < 0.01 |     | na      | -        | < 0.01 |        | na      | -        | < 0.01 |       |   |
| 749  | Grp2          | CA2644      | 8  | Reductase (BH     | 37.6         | 6.4    | 0.035  | 0.03  | 0.02   | 0   | 0.57    | 0.584    | < 0.01 |        | < 0.29  | na       | 0.037  | 0.008 |   |
| 742  | Grp4          | CA0671      | 6  | putative reduct   | 38.0         | 5.0    | 0.018  | 0.005 | < 0.01 |     | < 0.56  | na       | < 0.01 |        | < 0.56  | na       | 0.018  | 0.008 |   |
| 836  | Grx3          | CA1161      | 7  | Glutaredoxin-li   | 28.4         | 4.3    | 0.136  | 0.027 | 0.08   | 0   | 0.59    | 0.033    | 0.087  | 0      | 0.64    | 0.131    | < 0.01 |       | < |
| 963  | Gsp1          | CA2675      | #  | GTP-binding pr    | 24.3         | 7.0    | 0.064  | 0.008 | 0.106  | 0   | 1.66    | 0.011    | 0.128  | 0      | 2.00    | 0.064    | 0.158  | 0.015 |   |
| 155  | Gut2          | CA3566      | 5  | Glycerol-3-pho    | 72.5         | 6.9    | 0.021  | 0.004 | 0.029  | 0   | 1.38    | 0.073    | 0.041  | 0      | 1.95    | 0.01     | 0.016  | 0.003 |   |
| 739  | Hcr1 + Rpl10e | CA6012      | 1  | putative transla  | 32.0         | 4.6    | < 0.01 |       | 0.08   | 0   | > 8.00  | na       | 0.071  | 0      | > 7.10  | na       | 0.054  | 0.01  | > |
| 741  | His1          | CA4792      | 2  | ATP Phosphori     | 32.6         | 5.0    | 0.274  | 0.024 | 0.115  | 0   | 0.42    | 0.004    | 0.12   | 0      | 0.44    | 0.002    | 0.079  | 0.005 |   |
| 578  | Hom6          | CA4181      | 2  | homoserine de     | 38.8         | 5.0    | 1.027  | 0.252 | 0.138  | 0.1 | 0.13    | 0.004    | 0.233  | 0      | 0.23    | 0.032    | 0.182  | 0.035 |   |

|      |                |        |                             |         |         |        |       |        |     |        |          |        |     |        |          |        |         |
|------|----------------|--------|-----------------------------|---------|---------|--------|-------|--------|-----|--------|----------|--------|-----|--------|----------|--------|---------|
| 961  | Hpt1           | CA3787 | 8 hypoxanthine g            | 24.3    | 5.0     | 0.092  | 0.011 | 0.149  | 0   | 1.62   | 0.004    | 0.257  | 0.1 | 2.79   | 0.005    | 0.065  | 0.042   |
| 396  | Icl1 1         | CA4446 | 5 Isocitrate lyase          | 61.4    | 7.3     | < 0.01 |       | < 0.01 |     | na     | -        | < 0.01 |     | na     | -        | < 0.01 |         |
| 750  | Icl1 2         | CA4446 | 5 Isocitrate lyase          | 61.4    | 7.3     | < 0.01 |       | < 0.01 |     | na     | -        | < 0.01 |     | na     | -        | < 0.01 |         |
| 605  | Ild4           | CA2416 | 1 Putative aryl-al          | 38.3    | 6.3     | < 0.01 |       | 0.019  | 0   | > 1.90 | na       | < 0.01 |     | na     | -        | 0.076  | 0.006 > |
| 663  | Ilv5           | CA1983 | 1, ketol-acid redu          | 44.9    | 6.5     | 0.155  | 0.034 | 0.034  | 0   | 0.22   | 0.018    | < 0.01 |     | < 0.06 | na       | 0.141  | 0.038   |
| 336  | Ino1 1         | CA5986 | # myo-inositol-1- $\gamma$  | 57.8    | 5.2     | 0.07   | 0.007 | 0.055  | 0.1 | 0.79   | 0.755    | 0.063  | 0   | 0.90   | 0.267    | 0.018  | 0.001   |
| 346  | Ino1 2         | CA5986 | 2, myo-inositol-1- $\gamma$ | 57.8    | 5.2     | 0.519  | 0.126 | 0.067  | 0   | 0.13   | 0.017    | 0.283  | 0   | 0.55   | 0.037    | 0.036  | 0.018   |
| 355  | Ino1 3         | CA5986 | # myo-inositol-1- $\gamma$  | 57.8    | 5.2     | 0.016  | 0.003 | 0.025  | 0   | 1.56   | 0.417    | < 0.01 |     | < 0.63 | na       | < 0.01 | >       |
| 780  | Ino1 4         | CA5986 | # myo-inositol-1- $\gamma$  | 57.8    | 5.2     | < 0.01 |       | < 0.01 |     | na     | -        | < 0.01 |     | na     | -        | < 0.01 |         |
| 1    | IPF10645       | CA1944 | 4, unknown functi           | 63.8    | 6.1     | < 0.01 |       | < 0.01 |     | na     | -        | < 0.01 |     | na     | -        | 0.017  | 0.002 > |
| 1014 | IPF10896       | CA0540 | 3 NADH dehydro              | 19.9    | 5.4     | 0.045  | 0.01  | 0.091  | 0   | 2.02   | 0.009    | 0.093  | 0   | 2.07   | 0.011    | 0.059  | 0.009   |
| 1006 | IPF11888       | CA4416 | 2 Unknown funct             | 25.0    | 5.3     | 1.47   | 0.171 | 0.233  | 0   | 0.16   | 0.006    | 0.267  | 0.1 | 0.18   | 3.23E-04 | 0.654  | 0.144   |
| 984  | IPF11900       | CA3730 | 8 Unknown funct             | 23.4    | 4.7     | 0.034  | 0.006 | 0.032  | 0   | 0.94   | 0.707    | 0.048  | 0   | 1.41   | 0.044    | 0.03   | 0.002   |
| 232  | IPF11965       | CA2807 | 8 unknown functi            | 85.6    | 5.2     | 0.129  | 0.094 | 0.029  | 0   | 0.22   | 0.277    | < 0.01 |     | < 0.08 | na       | 0.148  | 0.122   |
| 806  | IPF12897       | CA0271 | 2 putative oxidor           | 36.3    | 5.4     | 0.14   | 0.009 | 0.039  | 0   | 0.28   | 5.32E-05 | 0.065  | 0   | 0.46   | 4.10E-04 | 0.042  | 0.016   |
| 900  | IPF13316       | CA1880 | # unknown functi            | 27.8    | 4.4     | < 0.01 |       | < 0.01 |     | na     | -        | < 0.01 |     | na     | -        | < 0.01 |         |
| 769  | IPF13975       | CA0511 | 6 unknown functi            | 34.3    | 7.0     | 0.013  | 0.001 | < 0.01 |     | < 0.77 | na       | < 0.01 |     | < 0.77 | na       | 0.027  | 0.001   |
| 529  | IPF14116       | CA0464 | 5, unknown functi           | 45.6    | 6.7     | 0.217  | 0.029 | 0.088  | 0.1 | 0.41   | 0.026    | 0.163  | 0.1 | 0.75   | 0.328    | 0.045  | 0.006   |
| 597  | IPF14171.5f    | CA6179 | 8 unknown functi            | Unknown | Unknown | 0.02   | 0.003 | 0.03   | 0   | 1.50   | 0.047    | < 0.01 |     | < 0.50 | na       | 0.064  | 0.01    |
| 247  | IPF16300       | CA2290 | 4 putative aldehy           | 58.3    | 6.5     | < 0.01 |       | < 0.01 |     | na     | -        | < 0.01 |     | na     | -        | 0.022  | 0 >     |
| 916  | IPF18418       | CA2756 | 6 Unknown funct             | 33.8    | 5.1     | 0.07   | 0.037 | < 0.01 |     | < 0.14 | na       | < 0.01 |     | < 0.14 | na       | 0.03   | 0.023   |
| 523  | IPF1899 + IPF; | CA5280 | 7 unknown functi            | 46.8    | 6.6     | 0.018  | 0     | 0.037  | 0   | 2.06   | 0.55     | < 0.01 |     | < 0.56 | na       | < 0.01 | <       |
| 614  | IPF1943        | CA5290 | 7 similar to Aspe           | 39.3    | 7.2     | 0.132  | 0.016 | 0.046  | 0   | 0.35   | 0.007    | 0.043  | 0   | 0.33   | 0.007    | < 0.01 | <       |
| 519  | IPF19782       | CA3421 | # unknown functi            | 40.9    | 4.7     | < 0.01 |       | 0.009  | 0   | < 0.90 | na       | 0.023  | 0   | > 2.30 | na       | 0.018  | 0.005 > |
| 404  | IPF19983       | CA3336 | 5 unknown functi            | 55.1    | 6.2     | < 0.01 |       | < 0.01 |     | na     | -        | < 0.01 |     | na     | -        | < 0.01 | >       |
| 412  | IPF2086        | CA4331 | 8 unknown functi            | 47.3    | 4.7     | 0.02   | 0.001 | 0.038  | 0   | 1.90   | 0.349    | 0.032  | 0   | 1.60   | 0.041    | 0.03   | 0.018   |
| 1013 | IPF2431        | CA5714 | 7 similar to Saccl          | 21.9    | 4.7     | < 0.01 |       | < 0.01 |     | na     | -        | < 0.01 |     | na     | -        | < 0.01 |         |
| 19   | IPF2653        | CA5709 | # unknown functi            | 117.5   | 5.5     | < 0.01 |       | < 0.01 |     | na     | -        | < 0.01 |     | na     | -        | < 0.01 |         |
| 560  | IPF3358        | CA4783 | 7 ubiquinol-cytoc           | 47.9    | 7.0     | 0.124  | 0.029 | 0.355  | 0   | 2.86   | 0.005    | 0.28   | 0   | 2.26   | 0.007    | < 0.01 | <       |
| 863  | IPF3630        | CA4343 | 2 Unknown funct             | 29.5    | 5.6     | 0.052  | 0.004 | < 0.01 |     | < 0.19 | na       | < 0.01 |     | 0.19   | -        | < 0.01 | <       |
| 1069 | IPF4065        | CA0386 | 1 Unknown funct             | 13.1    | 5.0     | < 0.01 |       | 0.123  | 0   | 12.30  | na       | 0.066  | 0   | > 6.60 | na       | 0.242  | 0.017 > |
| 762  | IPF4991        | CA1075 | 4, putative memb            | 37.0    | 7.1     | < 0.01 |       | < 0.01 |     | na     | -        | < 0.01 |     | na     | -        | 0.017  | 0.001   |
| 942  | IPF5222        | CA5381 | 7 arylalkylamine            | 24.8    | 4.5     | 0.147  | 0.02  | 0.091  | 0.1 | 0.62   | 0.19     | 0.153  | 0.1 | 1.04   | 0.886    | < 0.01 | <       |
| 179  | IPF5753        | CA4621 | 5 unknown functi            | 71.4    | 5.9     | < 0.01 |       | < 0.01 |     | na     | -        | < 0.01 |     | na     | -        | < 0.01 |         |
| 356  | IPF6459        | CA4477 | 5 unknown functi            | 55.3    | 6.5     | < 0.01 |       | < 0.01 |     | na     | -        | < 0.01 |     | na     | -        | < 0.01 |         |
| 723  | IPF6712.5f     | CA3955 | 1 unknown functi            | 27.1    | 7.3     | < 0.01 |       | 0.051  | 0   | > 5.10 | na       | 0.053  | 0   | > 5.30 | na       | 0.051  | 0.005 > |
| 767  | IPF7473        | CA0786 | 5 unknown functi            | 40.1    | 6.4     | < 0.01 |       | < 0.01 |     | na     | -        | < 0.01 |     | na     | -        | < 0.01 |         |
| 869  | IPF7778        | CA4167 | 6 putative carbox           | 28.4    | 6.2     | 0.032  | 0.006 | < 0.01 |     | < 0.31 | na       | < 0.01 |     | < 0.31 | na       | 0.035  | 0.011   |
| 1031 | IPF894         | CA5335 | 5 unknown functi            | 15.4    | 5.0     | < 0.01 |       | < 0.01 |     | na     | -        | < 0.01 |     | na     | -        | < 0.01 |         |
| 1052 | IPF9407 + Mci  | CA3408 | 8 similar to Saccl          | 17.7    | 4.5     | 0.025  | 0.016 | 0.054  | 0   | 2.16   | 0.257    | 0.081  | 0   | 3.24   | 0.249    | 0.03   | 0.019   |
| 24   | IPF9914        | CA1427 | 5 alanyl-tRNA sy            | 108.3   | 5.9     | < 0.01 |       | < 0.01 |     | na     | -        | < 0.01 |     | na     | -        | < 0.01 |         |
| 170  | Kar2 1         | CA0915 | 6 dnaK-type mok             | 74.6    | 4.6     | 0.04   | 0.002 | < 0.01 |     | < 0.25 | na       | 0.17   | 0   | 4.25   | 0.137    | 0.07   | 0.029   |
| 174  | Kar2 2         | CA0915 | 6 dnaK-type mok             | 74.6    | 4.6     | 0.012  | 0     | < 0.01 |     | < 0.83 | na       | 0.108  | 0   | 9.00   | 0.07     | 0.044  | 0.031   |
| 37   | Kgd1           | CA3149 | 1 2-Oxoglutarate            | 112.0   | 6.3     | < 0.01 |       | 0.081  | 0   | > 8.10 | na       | 0.037  | 0   | > 3.70 | na       | 0.109  | 0.04 >  |

|      |               |        |    |                  |      |     |        |       |        |     |         |          |        |     |        |          |        |       |   |
|------|---------------|--------|----|------------------|------|-----|--------|-------|--------|-----|---------|----------|--------|-----|--------|----------|--------|-------|---|
| 270  | Lat1          | CA4875 | 2  | Dihydrolipoami   | 50.1 | 5.6 | 0.517  | 0.032 | 0.252  | 0   | 0.49    | 0.007    | 0.494  | 0   | 0.96   | 0.412    | 0.188  | 0.076 |   |
| 557  | Lsc2.3eoc     | CA0664 | 7  | succinate-CoA    | 18.9 | 4.2 | 0.56   | 0.011 | 0.48   | 0.2 | 0.86    | 0.456    | 0.617  | 0.1 | 1.10   | 0.288    | 0.198  | 0.055 |   |
| 595  | Lys12 1       | CA1737 | #  | homo-isocitrate  | 40.7 | 5.6 | < 0.01 |       | < 0.01 |     | na      | -        | < 0.01 |     | na     | -        | < 0.01 |       |   |
| 645  | Lys12 2       | CA1737 | 5, | homo-isocitrate  | 40.7 | 5.6 | 0.16   | 0.027 | 0.068  | 0   | 0.43    | 0.023    | 0.065  | 0   | 0.41   | 0.019    | 0.165  | 0.015 |   |
| 805  | Mdh11         | CA5826 | 1  | Malate dehydr    | 36.0 | 5.3 | 0.15   | 0.03  | 0.708  | 0.1 | 4.72    | 2.33E-04 | 0.412  | 0   | 2.75   | 1.24E-04 | 0.427  | 0.095 |   |
| 85   | Mef1          | CA3603 | 1  | mitochondrial ti | 84.4 | 6.3 | < 0.01 |       | 0.018  | 0   | > 1.80  | na       | 0.013  | 0   | > 1.30 | na       | 0.081  | 0.067 | > |
| 965  | Met14         | CA5404 | 6  | Adenylylsulfate  | 22.5 | 6.7 | 0.152  | 0.029 | 0.024  | 0   | 0.16    | 0.016    | < 0.01 |     | < 0.07 | na       | 0.135  | 0.016 |   |
| 507  | Met15         | CA2565 | 6  | O-acetylhomos    | 48.0 | 5.9 | 1.214  | 0.184 | 0.44   | 0.1 | 0.36    | 0.002    | 0.435  | 0   | 0.36   | 0.011    | 0.919  | 0.482 |   |
| 653  | Met222        | CA1149 | 2  | Putative phosp   | 38.7 | 5.4 | 0.055  | 0.006 | 0.018  | 0   | 0.33    | 7.36E-04 | 0.02   | 0   | 0.36   | 0.002    | 0.018  | 0.002 |   |
| 83   | Met6 1        | CA0653 | 4, | BH TO S.CERI     | 85.7 | 5.3 | < 0.01 |       | < 0.01 |     | na      | -        | < 0.01 |     | na     | -        | 0.018  | 0.001 | > |
| 181  | Met6 2        | CA0653 | 6  | BH TO S.CERI     | 85.7 | 5.3 | 0.033  | 0.003 | < 0.01 |     | < 0.30  | na       | < 0.01 |     | < 0.30 | na       | 0.015  | 0.007 |   |
| 213  | Met6 3        | CA0653 | 7  | BH TO S.CERI     | 85.7 | 5.3 | 0.026  | 0.004 | 0.025  | 0   | 0.96    | 0.962    | < 0.01 |     | < 0.38 | na       | < 0.01 |       | < |
| 726  | Met6 4        | CA0653 | 6  | BH TO S.CERI     | 85.7 | 5.3 | 0.03   | 0     | < 0.01 |     | < 0.33  | na       | < 0.01 |     | < 0.33 | na       | 0.043  | 0.006 |   |
| 914  | Met6 5        | CA0653 | 6  | BH TO S.CERI     | 85.7 | 5.3 | 0.13   | 0.014 | < 0.01 |     | < 0.08  | na       | < 0.01 |     | < 0.08 | na       | 0.069  | 0.023 |   |
| 987  | Met6 6        | CA0653 | 6  | BH TO S.CERI     | 85.7 | 5.3 | 0.046  | 0.027 | < 0.01 |     | < 0.22  | na       | < 0.01 |     | < 0.22 | na       | 0.024  | 0.016 |   |
| 975  | Mge1          | CA1738 | 8  | heat shock pro   | 27.2 | 5.7 | 0.177  | 0.02  | 0.213  | 0   | 1.20    | 0.084    | 0.227  | 0.1 | 1.28   | 0.196    | 0.131  | 0.013 |   |
| 1098 | Ntf2          | CA2082 | 2  | nuclear transp   | 14.2 | 4.2 | 0.133  | 0.013 | < 0.01 |     | < 0.08  | na       | < 0.01 |     | < 0.08 | na       | < 0.01 |       |   |
| 249  | Pck1          | CA5857 | 1  | phosphoenolpy    | 61.0 | 6.5 | < 0.01 |       | 0.21   | 0   | > 21.00 | na       | 0.079  | 0   | 7.90   | na       | 0.158  | 0.028 | > |
| 633  | Pdb1          | CA2162 | 2  | pyruvate dehyd   | 41.3 | 5.2 | 0.836  | 0.026 | 0.314  | 0   | 0.38    | 1.53E-05 | 0.478  | 0.1 | 0.57   | 8.34E-04 | 0.333  | 0.015 |   |
| 245  | Pdi1          | CA1755 | 2, | protein disulfid | 63.0 | 4.4 | 0.058  | 0.042 | < 0.01 |     | < 0.17  | na       | < 0.01 |     | 0.17   | na       | < 0.01 |       | < |
| 228  | Pdr13 1       | CA4844 | #  | Drug resistanc   | 58.5 | 4.5 | 0.028  | 0.007 | < 0.01 |     | < 0.36  | na       | < 0.01 |     | 0.36   | na       | 0.115  | 0.03  |   |
| 234  | Pdr13 2       | CA4844 | 2  | Drug resistanc   | 58.5 | 4.5 | 0.058  | 0.006 | < 0.01 |     | < 0.17  | na       | < 0.01 |     | 0.17   | na       | < 0.01 |       | < |
| 144  | Pex5 1        | CA2560 | 5  | peroxisomal tai  | 67.3 | 4.5 | < 0.01 |       | < 0.01 |     | na      | -        | < 0.01 |     | na     | -        | < 0.01 |       |   |
| 167  | Pex5 2        | CA2560 | 5  | peroxisomal tai  | 67.3 | 4.5 | < 0.01 |       | < 0.01 |     | na      | -        | < 0.01 |     | na     | -        | < 0.01 |       |   |
| 1084 | Pfy1          | CA3897 | 8  | BINDS TO AC      | 13.8 | 5.1 | 0.192  | 0.052 | 0.235  | 0   | 1.22    | 0.354    | 0.246  | 0.1 | 1.28   | 0.352    | 0.168  | 0.021 |   |
| 431  | Pmi40         | CA0988 | 2  | mannose-6-ph     | 48.9 | 5.0 | 0.104  | 0.016 | 0.043  | 0   | 0.41    | 0.033    | 0.089  | 0   | 0.86   | 0.191    | 0.037  | 0.006 |   |
| 959  | Pot11         | CA5862 | 5  | peroxysomal 3-   | 42.9 | 5.9 | < 0.01 |       | < 0.01 |     | na      | -        | < 0.01 |     | na     | -        | < 0.01 |       |   |
| 676  | Pot12         | CA1561 | #  | peroxysomal 3-   | 43.9 | 4.8 | < 0.01 |       | 0.039  | 0   | > 3.90  | na       | < 0.01 |     | na     | -        | 0.019  | 0.008 | > |
| 124  | Pox4 1        | CA1572 | 5  | peroxisomal fat  | 79.0 | 5.8 | < 0.01 |       | < 0.01 |     | na      | -        | 0.035  | 0   | 3.50   | na       | < 0.01 |       |   |
| 130  | Pox4 2        | CA1572 | 1, | peroxisomal fat  | 79.0 | 5.8 | < 0.01 |       | 0.022  | 0   | > 2.20  | na       | 0.019  | 0   | 1.90   | na       | 0.075  | 0.026 | > |
| 698  | Pox4 4        | CA1572 | #  | peroxisomal fat  | 79.0 | 5.8 | < 0.01 |       | < 0.01 |     | na      | -        | < 0.01 |     | na     | -        | < 0.01 |       |   |
| 970  | Pox4 5        | CA1572 | 5  | peroxisomal fat  | 79.0 | 5.8 | < 0.01 |       | < 0.01 |     | na      | -        | < 0.01 |     | na     | -        | < 0.01 |       |   |
| 870  | Pro3          | CA2570 | 3  | delta 1-pyrrolin | 29.0 | 5.2 | 0.072  | 0.017 | 0.265  | 0   | 3.68    | 0.002    | 0.224  | 0   | 3.11   | 3.47E-04 | 0.037  | 0.013 |   |
| 315  | Put2          | CA3399 | 1  | 1-pyrroline-5-c  | 65.8 | 7.7 | 0.012  | 0.002 | 0.723  | 0   | 60.25   | 0.001    | 0.437  | 0   | 36.42  | 0.012    | 0.072  | 0.011 |   |
| 327  | Rad23         | CA0231 | 2, | nucleotide exci  | 43.8 | 4.1 | 0.115  | 0.015 | < 0.01 |     | < 0.09  | na       | < 0.01 |     | < 0.09 | na       | < 0.01 |       | < |
| 1035 | Rbp1          | CA3676 | 8  | Rapamycin-bin    | 13.3 | 7.4 | 0.355  | 0.037 | 0.414  | 0   | 1.17    | 0.17     | 0.406  | 0.1 | 1.14   | 0.317    | 0.312  | 0.023 |   |
| 844  | Rfa2 + Yst1 2 | CA3573 | 2  | DNA replicator   | 29.4 | 4.5 | 0.016  | 0.004 | < 0.01 |     | < 0.63  | na       | < 0.01 |     | < 0.63 | na       | < 0.01 |       | < |
| 1075 | Rim1          | CA3804 | 8  | telomere-bindir  | 16.2 | 6.5 | 0.064  | 0.008 | 0.075  | 0   | 1.17    | 0.385    | 0.078  | 0   | 1.22   | 0.118    | 0.046  | 0.015 |   |
| 744  | Rpl10e 2      | CA5200 | 7  | Ribosomal prot   | 33.3 | 4.5 | 0.182  | 0.009 | 0.357  | 0.2 | 1.96    | 0.42     | 0.463  | 0.3 | 2.54   | 0.201    | < 0.01 |       | < |
| 1072 | Rps12         | CA5920 | 3  | acidic ribosom   | 15.7 | 4.4 | 0.081  | 0.022 | 0.192  | 0   | 2.37    | 0.021    | 0.316  | 0.1 | 3.90   | 0.023    | 0.028  | 0.009 |   |
| 478  | Sah1          | CA3018 | 8  | S-adenosyl-L-h   | 49.1 | 5.3 | 0.118  | 0.037 | 0.158  | 0   | 1.34    | 0.341    | 0.175  | 0   | 1.48   | 0.168    | 0.125  | 0.08  |   |
| 636  | Sgt2          | CA3796 | 8  | small glutamin   | 36.5 | 4.6 | 0.017  | 0     | 0.144  | 0.1 | 8.47    | 0.208    | 0.09   | 0.1 | 5.29   | 0.43     | 0.065  | 0.065 |   |
| 867  | Snz1          | CA4184 | 8  | stationary phas  | 31.8 | 5.8 | 0.097  | 0.041 | 0.108  | 0.1 | 1.11    | 0.824    | 0.107  | 0   | 1.10   | 0.73     | 0.055  | 0.015 |   |
| 496  | Ssa1          | CA2857 | 5  | Heat shock pro   | 70.1 | 4.7 | < 0.01 |       | < 0.01 |     | na      | -        | < 0.01 |     | na     | -        | < 0.01 |       |   |

|      |          |        |   |                   |      |     |        |       |        |     |   |       |          |        |     |        |       |        |       |   |
|------|----------|--------|---|-------------------|------|-----|--------|-------|--------|-----|---|-------|----------|--------|-----|--------|-------|--------|-------|---|
| 178  | Ssa4 1   | CA1230 | 1 | cahsp70 mRNA/     | 70.3 | 4.8 | < 0.01 |       | 0.113  | 0   | > | 11.30 | na       | 0.067  | 0   | 6.70   | na    | 0.183  | 0.149 | > |
| 390  | Ssa4 2   | CA1230 | 4 | cahsp70 mRNA/     | 70.3 | 4.8 | < 0.01 |       | < 0.01 |     |   | na    | -        | < 0.01 |     | na     | -     | 0.014  | 0.004 | > |
| 187  | Ssb1 1   | CA3534 | 8 | heat shock pro/   | 66.4 | 5.0 | 0.104  | 0.011 | 0.236  | 0   |   | 2.27  | 6.31E-04 | 0.251  | 0   | 2.41   | 0.001 | 0.228  | 0.082 |   |
| 301  | Ssb1 2   | CA3534 | 2 | heat shock pro/   | 66.4 | 5.0 | 0.093  | 0.011 | 0.046  | 0   |   | 0.49  | 0.006    | 0.063  | 0   | 0.68   | 0.018 | 0.028  | 0.002 |   |
| 466  | Ssb1 3   | CA3534 | 2 | heat shock pro/   | 66.4 | 5.0 | 0.012  | 0.001 | < 0.01 |     | < | 0.83  | na       | < 0.01 |     | < 0.83 | na    | < 0.01 |       | < |
| 357  | Sse1     | CA1911 | 2 | heat shock pro/   | 78.5 | 5.0 | 0.016  | 0.006 | < 0.01 |     | < | 0.63  | na       | < 0.01 |     | < 0.63 | na    | < 0.01 |       |   |
| 706  | Tal1     | CA2582 | 1 | transaldolase (l  | 35.7 | 4.6 | < 0.01 |       | 0.099  | 0   | > | 9.90  | na       | < 0.01 |     | na     | -     | 0.072  | 0.044 |   |
| 695  | Tes15    | CA6220 | 5 | Thioesterase (Bl  | 40.0 | 5.0 | < 0.01 |       | < 0.01 |     |   | na    | -        | < 0.01 |     | na     | -     | < 0.01 |       |   |
| 1008 | Tif51.3f | CA3752 | 1 | Translation initi | 16.6 | 5.0 | < 0.01 |       | 0.026  | 0   | > | 2.60  | na       | < 0.01 |     | na     | -     | 0.023  | 0.004 | > |
| 1087 | Tim9     | CA4298 | 3 | Mitochondrial ir  | 13.0 | 7.3 | 0.105  | 0.045 | 0.221  | 0   |   | 2.10  | 0.025    | 0.18   | 0.1 | 1.71   | 0.162 | 0.149  | 0.012 |   |
| 319  | Trp3     | CA5004 | 5 | Anthranilate sy   | 58.3 | 6.1 | < 0.01 |       | < 0.01 |     |   | na    | -        | < 0.01 |     | na     | -     | < 0.01 |       |   |
| 620  | Trp4     | CA4410 | # | Anthranilate ph   | 39.5 | 6.1 | < 0.01 |       | < 0.01 |     |   | na    | -        | < 0.01 |     | na     | -     | < 0.01 |       |   |
| 1096 | Trx1     | CA6010 | 1 | thioredoxin (BH-  | 11.5 | 4.7 | < 0.01 |       | 0.388  | 0.1 | > | 38.80 | na       | 0.263  | 0.3 | 26.30  | na    | 0.415  | 0.023 | > |
| 382  | Uap1     | CA1826 | 7 | UDP-N-acetylg     | 54.6 | 6.0 | 0.02   | 0.003 | 0.031  | 0   |   | 1.55  | 0.089    | < 0.01 |     | < 0.50 | na    | < 0.01 |       | < |
| 386  | Ugp1     | CA0435 | 1 | UTP--glucose-     | 52.6 | 6.4 | 0.015  | 0.002 | 0.036  | 0   |   | 2.40  | 0.016    | < 0.01 |     | < 0.67 | na    | 0.072  | 0.014 |   |
| 911  | Ura3     | CA2801 | 2 | orotidine-5 -mo   | 30.0 | 5.2 | 0.263  | 0.007 | 0.131  | 0   |   | 0.50  | 3.37E-04 | 0.184  | 0   | 0.70   | 0.004 | 0.124  | 0.013 |   |
| 344  | Vma2     | CA4078 | 2 | H+-transportin    | 57.2 | 4.7 | 0.028  | 0.002 | < 0.01 |     | > | 0.36  | na       | < 0.01 |     | < 0.36 | na    | < 0.01 |       | < |
| 843  | Yst1 1   | CA5022 | # | Ribosomal prot    | 28.7 | 4.5 | < 0.01 |       | < 0.01 |     |   | na    | -        | < 0.01 |     | na     | -     | 0.016  | 0.02  | > |
| 95   | Zwf1 1   | CA2634 | # | glucose-6-phos    | 58.3 | 6.5 | < 0.01 |       | < 0.01 |     |   | na    | -        | < 0.01 |     | na     | -     | < 0.01 |       |   |
| 370  | Zwf1 2   | CA2634 | 4 | glucose-6-phos    | 58.3 | 6.5 | < 0.01 |       | < 0.01 |     |   | na    | -        | < 0.01 |     | na     | -     | 0.043  | 0.013 | > |

### 1. BH: By Homology

### 2. Predicted values for Mass and pI are provided

### 3. Fold Difference is relative to Glucose

\* Selection categories:

#### Long-term changes (growth overnight)

- Q1 Up in Lac, CAA and Ole/ Down in 2% Glu (common glucose repressed)
- Q2 Down in Lac, CAA and Ole/ Up in 2% Glu (common glucose induced)
- Q3 Up in Lac only/ Down in 2% Glu (Lac-specific glucose repressed)
- Q4 Up in CAA only/ Down in 2% Glu (CAA-specific glucose repressed)
- Q5 Up in Ole only/ Down in 2% Glu (Ole-specific glucose repressed)
- Q6 Down in Lac only/ Up in 2% Glu (Lac-specific glucose induced)
- Q7 Down in CAA only/ Up in 2% Glu (CAA-specific glucose induced)
- Q8 Down in Ole only/ Up in 2% Glu (Ole-specific glucose induced)

#### Short-term changes (2 h after addition of 0.1% glucose)

- Q9 Up in Lac, CAA and Ole/ Down in 2% Glu (common glucose repressed)
- Q10 Down in Lac, CAA and Ole/ Up in 2% Glu (common glucose induced)
- Q11 Up in Lac only/ Down in 2% Glu (Lac-specific glucose repressed)
- Q12 Up in CAA only/ Down in 2% Glu (CAA-specific glucose repressed)
- Q13 Up in Ole only/ Down in 2% Glu (Ole-specific glucose repressed)
- Q14 Down in Lac only/ Up in 2% Glu (Lac-specific glucose induced)
- Q15 Down in CAA only/ Up in 2% Glu (CAA-specific glucose induced)
- Q16 Down in Ole only/ Up in 2% Glu (Ole-specific glucose induced)

| Lactate |          | Lactate + Glu |      |          |          | Oleic Acid |       |          |          | Oleic Acid + Glu |       |          |          |
|---------|----------|---------------|------|----------|----------|------------|-------|----------|----------|------------------|-------|----------|----------|
| Fold D  | T-test   | Norm vol      | SD   | Fold Dif | T-test   | Norm vo    | SD    | Fold Dif | T-test   | Norm vol         | SD    | Fold Dif | T-test   |
| 0.81    | 0.484    | 0.309         | 0.02 | 1.14     | 0.456    | 0.066      | 0.028 | 0.24     | 0.011    | 0.073            | 0.014 | 0.27     | 0.011    |
| 1.60    | na       | < 0.01        |      | na       | -        | < 0.01     |       | na       | -        | < 0.01           |       | na       | -        |
| 12.50   | na       | < 0.01        |      | na       | -        | 0.087      | 0.011 | > 8.70   | na       | 0.044            | 0.003 | > 4.40   | na       |
| 2.80    | 5.72E-04 | 1.257         | 0.14 | 2.54     | 0.002    | 1.758      | 0.268 | 3.56     | 0.002    | 1.184            | 0.133 | 2.40     | 0.002    |
| 0.81    | 0.412    | 0.041         | 0.01 | 1.95     | 0.054    | 0.014      | 0     | 0.67     | 0.171    | 0.018            | 0.003 | 0.86     | 0.433    |
| 7.50    | na       | < 0.01        |      | na       | -        | < 0.01     |       | na       | -        | 0.017            | 0.002 | 1.70     | na       |
| 0.75    | 0.029    | 0.141         | 0.03 | 0.90     | 0.376    | 0.073      | 0.002 | 0.46     | 3.22E-04 | 0.136            | 0.015 | 0.87     | 0.129    |
| 125.70  | 0.027    | 2.001         | 0.1  | 87.00    | 1.13E-04 | 0.868      | 0.162 | 37.74    | 0.012    | 0.315            | 0.048 | 13.70    | 0.004    |
| 2.80    | na       | < 0.01        |      | na       | -        | < 0.01     |       | na       | -        | < 0.01           |       | na       | -        |
| na      | -        | < 0.01        |      | na       | -        | 0.069      | 0.072 | > 6.90   | na       | 0.016            | 0.003 | > 1.60   | na       |
| 0.17    | na       | 0.019         | 0.01 | 0.32     | 0.004    | < 0.01     |       | < 0.17   | na       | 0.024            | 0.011 | 0.40     | 0.01     |
| 0.71    | 0.022    | 0.077         | 0.01 | 1.33     | 0.132    | 0.017      | 0.005 | 0.29     | 0.009    | 0.04             | 0.007 | 0.69     | 0.043    |
| 1.41    | 0.036    | < 0.01        |      | < 0.24   | na       | 0.04       | 0.011 | 0.98     | 0.952    | 0.042            | 0.003 | 1.02     | 0.887    |
| 0.33    | 0.001    | 0.07          | 0.01 | 0.58     | 0.005    | 0.055      | 0.003 | 0.46     | 0.007    | 0.058            | 0.005 | 0.48     | 0.002    |
| 0.22    | 0.018    | 0.108         | 0    | 0.50     | 0.042    | 0.099      | 0.008 | 0.46     | 0.007    | 0.136            | 0.003 | 0.63     | 0.074    |
| 1.90    | 0.411    | 0.023         | 0.01 | 0.74     | 0.45     | 0.034      | 0.008 | 1.10     | 0.833    | 0.038            | 0.005 | 1.23     | 0.519    |
| 1.38    | 0.132    | 0.04          | 0    | 0.95     | 0.713    | 0.119      | 0.006 | 2.83     | 1.27E-04 | 0.096            | 0.018 | 2.29     | 0.008    |
| 5.10    | na       | < 0.01        |      | na       | -        | < 0.01     |       | na       | -        | 0.012            | 0.001 | > 1.20   | na       |
| 1.48    | 0.003    | 0.057         | 0.01 | 1.14     | 0.355    | 0.203      | 0.049 | 4.06     | 0.033    | 0.168            | 0.011 | 3.36     | 6.53E-05 |
| 0.38    | 5.17E-04 | 1.172         | 0.03 | 0.60     | 1.57E-04 | 1.374      | 0.789 | 0.70     | 0.337    | 1.667            | 0.134 | 0.86     | 0.04     |
| na      | -        | < 0.01        |      | na       | -        | 0.043      | 0.02  | > 4.30   | na       | 0.139            | 0.142 | > 13.90  | na       |
| 0.46    | 0.03     | 0.084         | 0.01 | 0.65     | 0.093    | 0.051      | 0.029 | 0.40     | 0.041    | 0.08             | 0.008 | 0.62     | 0.08     |
| 0.22    | na       | < 0.01        |      | < 0.22   | na       | < 0.01     |       | < 0.22   | na       | < 0.01           |       | < 0.22   | na       |
| 9.70    | na       | 0.02          | 0    | > 2.00   | na       | 0.523      | 0.119 | > 52.30  | na       | 0.221            | 0.026 | > 22.10  | na       |
| 10.00   | 0.01     | 0.038         | 0.01 | 3.17     | 0.011    | 0.512      | 0.036 | 42.67    | 0.002    | 0.236            | 0.021 | 19.67    | 0.003    |
| na      | -        | < 0.01        |      | na       | -        | 0.045      | 0.029 | > 4.50   | na       | 0.024            | 0.007 | > 2.40   | na       |
| 1.44    | 0.107    | 0.023         | 0.01 | 1.44     | 0.138    | < 0.01     |       | < 0.63   | na       | 0.019            | 0.01  | 1.19     | 0.621    |
| 1.70    | na       | < 0.01        |      | na       | -        | < 0.01     |       | na       | -        | 0.009            | 0.004 | > 0.90   | na       |
| 1.70    | 0.001    | 0.048         | 0.02 | 1.60     | 0.229    | < 0.01     |       | < 0.33   | na       | 0.034            | 0.006 | 1.13     | 0.376    |
| 0.46    | 0.104    | 0.022         | 0    | 0.56     | 0.087    | < 0.01     |       | < 0.26   | na       | 0.026            | 0.006 | 0.67     | 0.179    |
| 0.16    | na       | 0.022         | 0    | 0.35     | 0.322    | < 0.01     |       | < 0.16   | na       | 0.04             | 0.007 | 0.65     | 0.496    |
| 1.30    | 0.526    | 0.102         | 0.01 | 1.10     | 0.286    | 0.436      | 0.063 | 4.69     | 0.011    | 0.24             | 0.018 | 2.58     | 1.91E-04 |
| na      | -        | < 0.01        |      | na       | -        | < 0.01     |       | na       | -        | 0.035            | 0.023 | > 3.50   | na       |
| na      | -        | < 0.01        |      | na       | -        | 0.043      | 0.032 | > 4.30   | na       | 0.01             | 0.004 | > 1.00   | na       |
| 0.94    | 0.657    | 0.438         | 0.03 | 1.01     | 0.939    | 0.157      | 0.034 | 0.36     | 0.001    | 0.165            | 0.006 | 0.38     | 0.012    |
| 0.90    | 0.484    | 0.269         | 0.01 | 1.20     | 0.13     | 0.18       | 0.024 | 0.80     | 0.15     | 0.15             | 0.012 | 0.67     | 0.03     |
| 0.30    | 0.041    | 0.188         | 0.03 | 0.97     | 0.895    | 0.109      | 0.049 | 0.56     | 0.164    | 0.108            | 0.014 | 0.56     | 0.049    |
| 0.64    | 0.072    | 0.112         | 0.03 | 1.26     | 0.406    | 0.083      | 0.042 | 0.93     | 0.847    | 0.145            | 0.057 | 1.63     | 0.282    |
| 2.80    | na       | 0.02          | 0.01 | > 2.00   | na       | 0.045      | 0.005 | > 4.50   | na       | 0.029            | 0.001 | > 2.90   | na       |

|       |          |        |      |         |       |        |       |         |          |        |       |         |          |
|-------|----------|--------|------|---------|-------|--------|-------|---------|----------|--------|-------|---------|----------|
| na    | -        | < 0.01 |      | na      | -     | 0.062  | 0.026 | > 6.20  | na       | 0.04   | 0.014 | > 4.00  | na       |
| 20.00 | na       | 0.09   | 0.07 | > 9.00  | na    | < 0.01 |       | na      | -        | < 0.01 |       | na      | -        |
| 0.83  | 0.263    | 0.12   | 0.01 | > 0.80  | 0.026 | 0.053  | 0.009 | 0.35    | 4.76E-04 | 0.063  | 0.003 | 0.42    | 4.03E-04 |
| 4.20  | na       | 0.045  | 0    | > 4.50  | na    | 0.018  | 0.001 | > 1.80  | na       | 0.022  | 0.002 | > 2.20  | na       |
| 11.70 | na       | 0.079  | 0.01 | > 7.90  | na    | 0.037  | 0.01  | > 3.70  | na       | 0.03   | 0.005 | > 3.00  | na       |
| 0.26  | 0.007    | 0.118  | 0    | 0.57    | 0.036 | 0.063  | 0.002 | 0.30    | 0.007    | 0.078  | 0.004 | 0.38    | 0.017    |
| 1.21  | 0.291    | 0.056  | 0.03 | 0.90    | 0.795 | 0.021  | 0.002 | 0.34    | 0.003    | 0.025  | 0.002 | 0.40    | 0.004    |
| 0.11  | 0.017    | 0.041  | 0    | 0.27    | 0.026 | 0.047  | 0     | 0.31    | 0.029    | 0.076  | 0.011 | 0.51    | 0.018    |
| 4.60  | na       | 0.01   |      | na      | -     | < 0.01 |       | na      | -        | 0.022  | 0.001 | > 2.20  | na       |
| na    | -        | 0.01   |      | na      | -     | 0.027  | 0.019 | 2.70    | na       | 0.016  | 0.007 | > 1.60  | na       |
| 0.95  | 0.932    | 0.102  | 0.02 | 1.24    | 0.339 | 0.023  | 0.006 | 0.28    | 0.037    | 0.03   | 0.012 | 0.37    | 0.023    |
| 0.34  | 0.027    | 0.15   | 0.02 | 1.03    | 0.744 | < 0.01 |       | < 0.07  | na       | 0.062  | 0.005 | 0.43    | 2.07E-04 |
| 0.74  | 0.021    | 0.023  | 0    | 0.66    | 0.002 | < 0.01 |       | < 0.29  | na       | 0.017  | 0.001 | 0.49    | 5.37E-05 |
| 3.24  | 0.006    | 0.053  | 0.02 | 1.29    | 0.494 | 0.205  | 0.06  | 5.00    | 0.01     | 0.251  | 0.066 | 6.12    | 0.006    |
| na    | -        | < 0.01 |      | na      | -     | 0.066  | 0.014 | > 6.60  | na       | 0.045  | 0.022 | > 4.50  | na       |
| na    | -        | < 0.01 |      | na      | -     | 0.053  | 0.003 | > 5.30  | na       | 0.04   | 0.01  | > 4.00  | na       |
| na    | -        | < 0.01 |      | na      | -     | < 0.01 |       | na      | -        | 0.016  | 0.002 | > 1.60  | na       |
| na    | -        | < 0.01 |      | na      | -     | 0.344  | 0.091 | > 34.40 | na       | 0.211  | 0.021 | > 21.10 | na       |
| na    | -        | 0.023  | 0    | > 2.30  | na    | 0.081  | 0.047 | > 8.10  | na       | 0.046  | 0.01  | > 4.60  | na       |
| na    | -        | < 0.01 |      | na      | -     | 0.034  | 0.01  | > 3.40  | na       | 0.019  | 0.005 | > 1.90  | na       |
| na    | -        | < 0.01 |      | na      | -     | 0.03   | 0.004 | > 3.00  | na       | 0.019  | 0.006 | > 1.90  | na       |
| 1.90  | na       | < 0.01 |      | na      | -     | 0.107  | 0.08  | > 10.70 | na       | 0.05   | 0.007 | > 5.00  | na       |
| na    | -        | < 0.01 |      | na      | -     | 0.068  | 0.013 | > 6.80  | na       | 0.022  | 0.001 | > 2.20  | na       |
| 10.40 | na       | 0.075  | 0.01 | > 7.50  | na    | 0.044  | 0.003 | > 4.40  | na       | 0.03   | 0.009 | > 3.00  | na       |
| 35.20 | na       | 0.2    | 0.02 | > 20.00 | na    | 0.234  | 0.017 | > 23.40 | na       | 0.127  | 0.005 | > 12.70 | na       |
| na    | -        | < 0.01 |      | na      | -     | 0.057  | 0.008 | > 5.70  | na       | 0.041  | 0.023 | > 4.10  | na       |
| 0.77  | 0.05     | 0.024  | 0    | 0.36    | 0.008 | 0.196  | 0.036 | 2.97    | 0.004    | 0.121  | 0.038 | 1.83    | 0.073    |
| 0.65  | 0.019    | 0.169  | 0.02 | 0.50    | 0.005 | 0.917  | 0.16  | 2.73    | 0.004    | 0.568  | 0.031 | 1.69    | 0.002    |
| 2.33  | 0.025    | 0.216  | 0.08 | 1.31    | 0.526 | 0.192  | 0.025 | 1.16    | 0.592    | 0.15   | 0.032 | 0.91    | 0.766    |
| 0.79  | 0.014    | 0.084  | 0.03 | 0.86    | 0.519 | 0.068  | 0.005 | 0.69    | 0.002    | 0.056  | 0.003 | 0.57    | 1.80E-04 |
| 0.15  | na       | 0.019  | 0    | 0.29    | 0.111 | < 0.01 |       | < 0.15  | na       | 0.02   | 0.008 | 0.30    | 0.051    |
| 4.10  | na       | 0.058  | 0.03 | > 5.80  | na    | < 0.01 |       | na      | -        | 0.019  | 0.008 | > 1.90  | na       |
| na    | -        | < 0.01 |      | na      | -     | 0.013  | 0.002 | > 1.30  | na       | 0.02   | 0.014 | > 2.00  | na       |
| na    | -        | < 0.01 |      | na      | -     | 0.028  | 0.007 | > 2.80  | na       | 0.018  | 0.007 | > 1.80  | na       |
| 0.63  | 0.138    | 0.072  | 0    | 0.54    | 0.083 | 0.337  | 0.056 | 2.51    | 0.006    | 0.274  | 0.034 | 2.04    | 0.007    |
| na    | -        | < 0.01 |      | na      | -     | 0.059  | 0.029 | > 5.90  | na       | 0.04   | 0.023 | > 4.00  | na       |
| 1.06  | 0.884    | 0.023  | 0.01 | 0.66    | 0.529 | < 0.01 |       | < 0.29  | na       | < 0.01 |       | < 0.29  | na       |
| 1.00  | 0.989    | < 0.01 |      | 0.56    | -     | 0.033  | 0.013 | 1.83    | 0.234    | 0.034  | 0.005 | 1.89    | 0.045    |
| 0.07  | na       | 0.085  | 0.02 | 0.63    | 0.05  | 0.038  | 0.019 | 0.28    | 0.022    | 0.056  | 0.007 | 0.41    | 0.007    |
| 2.47  | 6.25E-04 | 0.066  | 0.01 | 1.03    | 0.832 | 0.161  | 0.017 | 2.52    | 9.34E-04 | 0.131  | 0.016 | 2.05    | 0.003    |
| 0.76  | 0.177    | 0.017  | 0    | 0.81    | 0.349 | 0.216  | 0.07  | 10.29   | 0.04     | 0.192  | 0.026 | 9.14    | 3.72E-04 |
| 5.40  | na       | 0.065  | 0.01 | > 6.50  | na    | 0.074  | 0.018 | > 7.40  | na       | 0.054  | 0.012 | > 5.40  | na       |
| 0.29  | 0.002    | 0.128  | 0.02 | 0.47    | 0.001 | 0.125  | 0.071 | 0.46    | 0.037    | 0.157  | 0.006 | 0.57    | 0.001    |
| 0.18  | 0.029    | 0.321  | 0.02 | 0.31    | 0.04  | 0.178  | 0.121 | 0.17    | 0.006    | 0.282  | 0.024 | 0.27    | 0.036    |

|       |          |        |      |         |          |        |       |         |          |        |       |         |          |
|-------|----------|--------|------|---------|----------|--------|-------|---------|----------|--------|-------|---------|----------|
| 0.71  | 0.349    | 0.16   | 0.01 | 1.74    | 7.73E-04 | 0.021  | 0.007 | 0.23    | 6.30E-04 | 0.071  | 0.006 | 0.77    | 0.038    |
| na    | -        | < 0.01 |      | na      | -        | 0.024  | 0.007 | > 2.40  | na       | < 0.01 |       | na      | -        |
| na    | -        | < 0.01 |      | na      | -        | 0.019  | 0.004 | > 1.90  | na       | 0.016  | 0.007 | > 1.60  | na       |
| 7.60  | na       | < 0.01 |      | na      | -        | 0.034  | 0.012 | > 3.40  | na       | 0.021  | 0.002 | > 2.10  | na       |
| 0.91  | 0.693    | 0.19   | 0.02 | 1.23    | 0.197    | 0.134  | 0.014 | 0.86    | 0.483    | 0.135  | 0.022 | 0.87    | 0.452    |
| 0.26  | 0.002    | 0.059  | 0.01 | 0.84    | 0.265    | 0.018  | 0.008 | 0.26    | 0.004    | 0.023  | 0.01  | 0.33    | 0.003    |
| 0.07  | 0.022    | 0.307  | 0.01 | 0.59    | 0.11     | 0.058  | 0.026 | 0.11    | 0.003    | 0.293  | 0.021 | 0.56    | 0.038    |
| 0.63  | na       | < 0.01 |      | < 0.63  | na       | < 0.01 |       | < 0.63  | na       | 0.015  | 0.004 | 0.94    | 0.968    |
| na    | -        | < 0.01 |      | na      | -        | < 0.01 |       | na      | -        | 0.029  | 0.012 | > 2.90  | na       |
| 1.70  | na       | < 0.01 |      | na      | -        | < 0.01 |       | na      | -        | 0.035  | 0.019 | > 3.50  | na       |
| 1.31  | 0.148    | 0.062  | 0    | 1.38    | 0.12     | 0.044  | 0.003 | 0.98    | 0.887    | 0.039  | 0.001 | 0.87    | 0.449    |
| 0.44  | 0.003    | 0.985  | 0.09 | 0.67    | 0.012    | 0.734  | 0.103 | 0.50    | 0.003    | 0.72   | 0.068 | 0.49    | 0.002    |
| 0.88  | 0.354    | 0.046  | 0.01 | 1.35    | 0.063    | 0.017  | 0     | 0.50    | 0.042    | 0.026  | 0.006 | 0.76    | 0.186    |
| 1.15  | 0.869    | 0.023  | 0.01 | 0.18    | 0.252    | < 0.01 |       | < 0.08  | na       | 0.017  | 0.004 | 0.13    | 0.34     |
| 0.30  | 7.76E-04 | 0.057  | 0.01 | 0.41    | 1.32E-04 | 0.03   | 0.004 | 0.21    | 3.90E-05 | 0.042  | 0.003 | 0.30    | 5.32E-05 |
| na    | -        | < 0.01 |      | na      | -        | < 0.01 |       | na      | -        | 0.012  | 0.003 | > 1.20  | na       |
| 2.08  | 0.005    | < 0.01 |      | < 0.77  | na       | 0.023  | 0.019 | 1.77    | 0.526    | 0.019  | 0.018 | 1.46    | 0.656    |
| 0.21  | 0.004    | 0.176  | 0.01 | 0.81    | 0.069    | 0.749  | 0.099 | 3.45    | 8.77E-04 | 0.357  | 0.011 | 1.65    | 0.001    |
| 3.20  | 0.027    | 0.058  | 0.02 | 2.90    | 0.072    | < 0.01 |       | < 0.50  | na       | < 0.01 |       | < 0.50  | na       |
| 2.20  | na       | 0.016  | 0    | > 1.60  | na       | < 0.01 |       | na      | -        | 0.022  | 0.002 | 2.20    | na       |
| 0.43  | 0.275    | < 0.01 |      | < 0.14  | na       | 0.033  | 0.008 | 0.47    | 0.171    | 0.032  | 0.011 | 0.46    | 0.168    |
| 0.56  | na       | < 0.01 |      | < 0.56  | na       | 0.203  | 0.022 | 11.28   | 0.005    | 0.099  | 0.016 | 5.50    | 0.013    |
| 0.08  | na       | 0.063  | 0.03 | 0.48    | 0.032    | 0.127  | 0.016 | 0.96    | 0.722    | 0.086  | 0.01  | 0.65    | 0.015    |
| 1.80  | na       | 0.014  | 0    | > 1.40  | na       | 0.013  | 0.002 | > 1.30  | na       | 0.013  | 0.001 | > 1.30  | na       |
| na    | -        | < 0.01 |      | na      | -        | 0.01   | 0.003 | > 1.00  | na       | 0.017  | 0     | > 1.70  | na       |
| 1.50  | 0.601    | 0.023  | 0.01 | 1.15    | 0.463    | 0.01   | 0.002 | 0.50    | 0.002    | 0.019  | 0.005 | 0.95    | 0.714    |
| na    | -        | < 0.01 |      | na      | -        | 0.037  | 0.029 | > 3.70  | na       | 0.039  | 0.028 | > 3.90  | na       |
| na    | -        | < 0.01 |      | na      | -        | < 0.01 |       | na      | -        | 0.021  | 0.005 | > 2.10  | na       |
| 0.08  | na       | 0.191  | 0.06 | 1.54    | 0.196    | 0.243  | 0.066 | 1.96    | 0.047    | 0.193  | 0.018 | 1.56    | 0.026    |
| 0.19  | na       | 0.021  | 0    | 0.40    | 7.84E-04 | 0.01   |       | < 0.19  | na       | 0.018  | 0.001 | 0.35    | 1.78E-04 |
| 24.20 | na       | 0.207  | 0.09 | > 20.70 | na       | 0.029  | 0.006 | 2.90    | na       | 0.015  | 0.003 | > 1.50  | na       |
| 1.70  | na       | < 0.01 |      | na      | -        | < 0.01 |       | na      | -        | < 0.01 |       | na      | -        |
| 0.07  | na       | 0.096  | 0.03 | 0.65    | 0.115    | 0.041  | 0.025 | 0.28    | 0.004    | 0.063  | 0.002 | 0.43    | 0.018    |
| na    | -        | < 0.01 |      | na      | -        | 0.021  | 0.008 | > 2.10  | na       | 0.021  | 0.001 | > 2.10  | na       |
| na    | -        | < 0.01 |      | na      | -        | 0.083  | 0.007 | > 8.30  | na       | 0.053  | 0.004 | > 5.30  | na       |
| 5.10  | na       | 0.055  | 0.01 | > 5.50  | na       | 0.029  | 0.006 | > 2.90  | na       | 0.022  | 0.002 | > 2.20  | na       |
| na    | -        | < 0.01 |      | na      | -        | 0.044  | 0.005 | > 4.40  | na       | 0.025  | 0.002 | > 2.50  | na       |
| 1.09  | 0.754    | < 0.01 |      | < 0.31  | na       | 0.036  | 0.004 | 1.13    | 0.494    | 0.03   | 0.003 | 0.94    | 0.582    |
| na    | -        | < 0.01 |      | na      | -        | 0.998  | 0.12  | > 99.80 | na       | 0.684  | 0.041 | > 68.40 | na       |
| 1.20  | 0.811    | 0.06   | 0.01 | 2.40    | 0.037    | < 0.01 |       | < 0.40  | na       | 0.036  | 0.009 | 1.44    | 0.382    |
| na    | -        | < 0.01 |      | na      | -        | 0.02   | 0.011 | > 2.00  | na       | 0.018  | 0.001 | > 1.80  | na       |
| 1.75  | 0.222    | 0.099  | 0.01 | 2.48    | 0.002    | 0.081  | 0.009 | 2.03    | 0.004    | 0.157  | 0.087 | 3.93    | 0.146    |
| 3.67  | 0.214    | 0.06   | 0.01 | 5.00    | 0.107    | 0.025  | 0.008 | 2.08    | 0.268    | 0.063  | 0.023 | 5.25    | 0.199    |
| 10.90 | na       | 0.031  | 0.01 | > 3.10  | na       | 0.105  | 0.031 | > 10.50 | na       | 0.05   | 0.043 | > 5.00  | na       |



|       |          |        |      |        |          |        |       |         |          |        |       |         |          |
|-------|----------|--------|------|--------|----------|--------|-------|---------|----------|--------|-------|---------|----------|
| 0.36  | 0.011    | 0.306  | 0.01 | 0.59   | 0.012    | 0.098  | 0.027 | 0.19    | 5.42E-04 | 0.267  | 0.018 | 0.52    | 0.001    |
| 0.35  | 3.60E-04 | 0.326  | 0    | 0.58   | 3.26E-06 | 0.396  | 0.235 | 0.71    | 0.352    | 0.541  | 0.04  | 0.97    | 0.482    |
| na    | -        | < 0.01 |      | na     | -        | < 0.01 |       | na      | -        | 0.052  | 0.023 | > 5.20  | na       |
| 1.03  | 0.808    | 0.174  | 0.03 | 1.09   | 0.63     | 0.35   | 0.042 | 2.19    | 0.011    | 0.364  | 0.047 | 2.28    | 0.013    |
| 2.85  | 0.009    | 0.324  | 0.02 | 2.16   | 9.39E-04 | 0.993  | 0.152 | 6.62    | 0.002    | 0.598  | 0.03  | 3.99    | 5.29E-05 |
| 8.10  | na       | 0.07   | 0.07 | > 7.00 | na       | 0.024  | 0.002 | > 2.40  | na       | 0.02   | 0.001 | > 2.00  | na       |
| 0.89  | 0.423    | 0.197  | 0.01 | 1.30   | 0.071    | 0.115  | 0.01  | 0.76    | 0.101    | 0.147  | 0.01  | 0.97    | 0.767    |
| 0.76  | 0.377    | 1.335  | 0.15 | 1.10   | 0.428    | 0.986  | 0.151 | 0.81    | 0.172    | 1.008  | 0.144 | 0.83    | 0.201    |
| 0.33  | 0.005    | 0.028  | 0    | 0.51   | 0.002    | 0.015  | 0.002 | 0.27    | 0.004    | 0.026  | 0.001 | 0.47    | 0.002    |
| 1.80  | na       | < 0.01 |      | na     | -        | < 0.01 |       | na      | -        | 0.013  | 0.001 | > 1.30  | na       |
| 0.45  | 0.024    | 0.015  | 0    | 0.45   | 8.93E-04 | 0.036  | 0.019 | 1.09    | 0.777    | 0.045  | 0.003 | 1.36    | 0.009    |
| 0.38  | na       | 0.022  | 0.01 | 0.85   | 0.463    | 0.019  | 0.009 | 0.73    | 0.281    | 0.018  | 0.005 | 0.69    | 0.114    |
| 1.43  | 0.21     | < 0.01 |      | 0.33   | -        | 0.035  | 0.018 | 1.17    | 0.658    | 0.046  | 0.012 | 1.53    | 0.142    |
| 0.53  | 0.03     | 0.074  | 0.01 | 0.57   | 0.006    | 0.047  | 0.016 | 0.36    | 0.003    | 0.046  | 0.009 | 0.35    | 9.46E-04 |
| 0.52  | 0.396    | < 0.01 |      | 0.22   | -        | 0.017  | 0.004 | 0.37    | 0.25     | 0.023  | 0.005 | 0.50    | 0.22     |
| 0.74  | 0.028    | 0.206  | 0.03 | 1.16   | 0.209    | 0.056  | 0.021 | 0.32    | 0.002    | 0.073  | 0.005 | 0.41    | 9.04E-04 |
| 0.08  | -        | < 0.01 |      | 0.08   | -        | < 0.01 |       | < 0.08  | na       | < 0.01 |       | < 0.08  | na       |
| 15.80 | na       | 0.045  | 0.03 | > 4.50 | na       | 0.065  | 0.02  | > 6.50  | na       | 0.021  | 0.007 | > 2.10  | na       |
| 0.40  | 1.52E-04 | 0.464  | 0.03 | 0.56   | 7.25E-05 | 0.089  | 0.048 | 0.11    | 1.84E-05 | 0.316  | 0.004 | 0.38    | 1.09E-04 |
| 0.17  | na       | < 0.01 |      | 0.17   | -        | < 0.01 |       | < 0.17  | na       | 0.041  | 0.007 | 0.71    | 0.64     |
| 4.11  | 0.014    | < 0.01 |      | 0.36   | -        | < 0.01 |       | < 0.36  | na       | 0.16   | 0.188 | 5.71    | 0.504    |
| 0.17  | na       | 0.065  | 0.02 | 1.12   | 0.588    | < 0.01 |       | < 0.17  | na       | 0.047  | 0.012 | 0.81    | 0.246    |
| na    | -        | < 0.01 |      | na     | -        | 0.02   | 0.004 | > 2.00  | na       | 0.018  | 0.003 | > 1.80  | na       |
| na    | -        | < 0.01 |      | na     | -        | 0.026  | 0.017 | > 2.60  | na       | 0.017  | 0.005 | > 1.70  | na       |
| 0.88  | 0.515    | 0.201  | 0.02 | 1.05   | 0.771    | 0.091  | 0.013 | 0.47    | 0.031    | 0.091  | 0.012 | 0.47    | 0.031    |
| 0.36  | 0.031    | 0.044  | 0.01 | 0.42   | 0.01     | 0.028  | 0.003 | 0.27    | 0.022    | 0.045  | 0.005 | 0.43    | 0.008    |
| na    | -        | < 0.01 |      | na     | -        | 0.024  | 0.014 | > 2.40  | na       | 0.023  | 0.02  | > 2.30  | na       |
| 1.90  | na       | < 0.01 |      | na     | -        | < 0.01 |       | na      | -        | 0.078  | 0.008 | > 7.80  | na       |
| na    | -        | < 0.01 |      | na     | -        | 0.031  | 0.01  | > 3.10  | na       | 0.016  | 0.004 | > 1.60  | na       |
| 7.50  | na       | 0.024  | 0.01 | > 2.40 | na       | 0.317  | 0.031 | > 31.70 | na       | 0.23   | 0.104 | > 23.00 | na       |
| na    | -        | < 0.01 |      | na     | -        | < 0.01 |       | na      | -        | 0.014  | 0.003 | > 1.40  | na       |
| na    | -        | < 0.01 |      | na     | -        | 0.045  | 0.044 | > 4.50  | na       | 0.037  | 0.026 | > 3.70  | na       |
| 0.51  | 0.1      | 0.027  | 0.01 | 0.38   | 0.014    | 0.051  | 0.031 | 0.71    | 0.375    | 0.03   | 0.002 | 0.42    | 0.054    |
| 6.00  | 0.012    | 0.048  | 0    | 4.00   | 1.18E-04 | 0.038  | 0.001 | 3.17    | 2.24E-05 | 0.026  | 0.003 | 2.17    | 0.002    |
| 0.09  | na       | < 0.01 |      | < 0.09 | na       | < 0.01 |       | < 0.09  | na       | 0.014  | 0.002 | 0.12    | 0.007    |
| 0.88  | 0.156    | 0.321  | 0.03 | 0.90   | 0.286    | 0.137  | 0.011 | 0.39    | 6.01E-04 | 0.155  | 0.013 | 0.44    | 8.92E-04 |
| 0.63  | na       | < 0.01 |      | < 0.63 | na       | < 0.01 |       | < 0.63  | -        | < 0.01 |       | < 0.63  | na       |
| 0.72  | 0.156    | 0.052  | 0.01 | 0.81   | 0.096    | 0.032  | 0.008 | 0.50    | 0.008    | 0.031  | 0.001 | 0.48    | 0.018    |
| 0.05  | na       | 0.559  | 0.02 | 3.07   | 8.80E-05 | 0.112  | 0.089 | 0.62    | 0.31     | 0.498  | 0.09  | 2.74    | 0.026    |
| 0.35  | 0.017    | 0.079  | 0.01 | 0.98   | 0.89     | 0.029  | 0.008 | 0.36    | 0.051    | 0.031  | 0.005 | 0.38    | 0.017    |
| 1.06  | 0.921    | 0.2    | 0.02 | 1.69   | 0.046    | 0.025  | 0.009 | 0.21    | 0.021    | 0.055  | 0.02  | 0.47    | 0.082    |
| 3.82  | 0.33     | 0.038  | 0.04 | 2.24   | 0.41     | < 0.01 |       | < 0.59  | na       | 0.012  | 0.001 | 0.71    | 0.007    |
| 0.57  | 0.17     | 0.047  | 0.01 | 0.48   | 0.113    | < 0.01 |       | < 0.10  | na       | 0.043  | 0.015 | 0.44    | 0.185    |
| na    | -        | < 0.01 |      | na     | -        | 0.012  | 0     | > 1.20  | na       | 0.037  | 0.001 | > 3.70  | na       |

|       |          |        |      |         |       |        |       |         |          |        |       |         |          |
|-------|----------|--------|------|---------|-------|--------|-------|---------|----------|--------|-------|---------|----------|
| 18.30 | na       | 0.153  | 0.02 | < 15.30 | na    | 0.034  | 0.022 | > 3.40  | na       | 0.018  | 0.006 | > 1.80  | na       |
| 1.40  | na       | 0.013  | 0    | < 1.30  | na    | < 0.01 |       | na      | -        | 0.015  | 0.004 | > 1.50  | na       |
| 2.19  | 0.28     | 0.187  | 0.15 | 1.80    | 0.429 | < 0.01 |       | < 0.10  | na       | 0.093  | 0.02  | 0.89    | 0.475    |
| 0.30  | 5.39E-04 | 0.054  | 0.01 | 0.58    | 0.008 | 0.031  | 0.017 | 0.33    | 0.006    | 0.071  | 0.012 | 0.76    | 0.076    |
| 0.83  | na       | < 0.01 |      | 0.83    | -     | < 0.01 |       | < 0.83  | na       | 0.016  | 0.004 | 1.33    | 0.384    |
| 0.63  | na       | < 0.01 |      | 0.63    | -     | < 0.01 |       | < 0.63  | na       | 0.007  | 0.002 | 0.44    | 0.13     |
| 7.20  | na       | 0.062  | 0    | < 6.20  | na    | 0.025  | 0.002 | > 2.50  | na       | 0.018  | 0.002 | > 1.80  | na       |
| na    | -        | < 0.01 |      | na      | -     | 0.023  | 0.001 | > 2.30  | na       | 0.016  | 0.006 | > 1.60  | na       |
| 2.30  | na       | 0.025  | 0    | > 2.50  | na    | 0.029  | 0.005 | > 2.90  | na       | 0.077  | 0.019 | > 7.70  | na       |
| 1.42  | 0.282    | 0.254  | 0.19 | 2.42    | 0.259 | 0.05   | 0.004 | 0.48    | 0.171    | 0.047  | 0.007 | 0.45    | 0.092    |
| na    | -        | < 0.01 |      | na      | -     | 0.02   | 0.003 | > 2.00  | na       | 0.025  | 0.002 | > 2.50  | na       |
| na    | -        | < 0.01 |      | na      | -     | < 0.01 |       | na      | -        | 0.027  | 0.001 | > 2.70  | na       |
| 41.50 | na       | 0.446  | 0.08 | > 44.60 | na    | 0.199  | 0.07  | > 19.90 | na       | 0.196  | 0.04  | > 19.60 | na       |
| 0.50  | na       | 0.017  | 0    | 0.85    | 0.359 | 0.022  | 0.011 | 1.10    | 0.781    | 0.028  | 0.002 | 1.40    | 0.015    |
| 4.80  | 0.02     | < 0.01 |      | < 0.67  | na    | 0.072  | 0.006 | 4.80    | 1.20E-04 | 0.044  | 0.003 | 2.93    | 9.61E-05 |
| 0.47  | 8.55E-05 | 0.168  | 0.02 | 0.64    | 0.001 | 0.097  | 0.008 | 0.37    | 1.22E-04 | 0.132  | 0.003 | 0.50    | 6.09E-06 |
| 0.36  | na       | < 0.01 |      | < 0.36  | na    | < 0.01 |       | < 0.36  | na       | 0.014  | 0.001 | 0.50    | 0.017    |
| 1.60  | na       | < 0.01 |      | na      | -     | < 0.01 |       | na      | -        | 0.05   | 0.021 | > 5.00  | na       |
| na    | -        | < 0.01 |      | na      | -     | < 0.01 |       | na      | -        | 0.017  | 0.007 | > 1.70  | na       |
| 4.30  | na       | < 0.01 |      | na      | -     | < 0.01 |       | na      | -        | < 0.01 |       | na      | -        |
