# Supplementary material for: The Evolutionary Rewiring of Ubiquitination Targets Has Reprogrammed the Regulation of Carbon Assimilation in the Pathogenic Yeast Candida albicans
Source: PubMed Central journal article supplement — mBio. 2012 Dec 11;3(6):e00495-12. doi: 10.1128/mBio.00495-12 (PMC3520108; doi:10.1128/mbio.00495-12), 2012-12-11
Supplement: mbo006121395st3.pdf [file mbo006121395st3.pdf]

Table S3. Primers used in this study

| Name                                                                                                                  | Use                                                          | Sequence (5'-3')                                                                                                                      |
|-----------------------------------------------------------------------------------------------------------------------|--------------------------------------------------------------|---------------------------------------------------------------------------------------------------------------------------------------|
| <b>Primers used for tagging in <i>S. cerevisiae</i></b>                                                               |                                                              |                                                                                                                                       |
| DS_1F                                                                                                                 | Amplification of <i>ICL1-MYC<sub>9</sub>-NAT</i> cassette    | TTTCTTTACGCCATTTTCTTTGAATTGATCTTCTTGACACCGGTTCCCATAGCAAAGCTTCGTAC<br>GCTGCAGGTGCGAC                                                   |
| DS_1R                                                                                                                 | Amplification of <i>ICL1-MYC<sub>9</sub>-NAT</i> cassette    | TAGGACAAGGATTAACCATTAGAAGTGCATAAACATAAGAAATTCGCCTCGAGACGGCATTTC<br>TGACAAGTATATATATTCC                                                |
| DS_2F                                                                                                                 | Amplification of <i>PCK1 HA<sub>6</sub>-KLTRP1</i> cassette  | CTCGAATTGAGGACCAGCGGCTAATACATCTGTGTGGCTCTGTCTTGATAAATCCTGCAGGTG<br>ACTCCGGTTCTGCTGCTAGT                                               |
| DS_2R                                                                                                                 | Amplification of <i>PCK1 HA<sub>6</sub>-KLTRP1</i> cassette  | TAAACGAAACATGTTTCGTTTCGATATGTTCAATCAAAAAAAAAAAAAAAAAAGAATTAGGAATTCGAGCTC<br>GCCTCGAGGCCAGAAGAC                                        |
| DS_3F                                                                                                                 | Amplification of <i>ICL1-MYC<sub>3</sub>-URA3</i> cassette   | CGATGGGTTATTGAAGTTAGCTCAAGGTGGTGTAGCGCAACAGCTGCTATGGGAACCGGTGT<br>CACAGAAGATCAATTCAAAGAAAATGGCGTAAAGAAATAGTCACAGCAGATCCTCCTC          |
| DS_3R                                                                                                                 | Amplification of <i>ICL1-MYC<sub>3</sub>-URA3</i> cassette   | CGTACACTCACGGCACTAATGGGCGATACGATACTATGATTGTGTTCCGGGATTAGTTTCGATTCA<br>ATCATTCCGCGCAGGAGGCATGGACAGAAATGTTATAATT                        |
| DiSc_F                                                                                                                | Diagnostic for <i>ICL1-MYC<sub>9</sub></i>                   | GGAGATTTAGCTGCTTTGATGGCTG                                                                                                             |
| DiMc_R                                                                                                                | Diagnostic for <i>ICL1-MYC<sub>9</sub></i>                   | GTCGACCTGCAGCGTACGAAGCTT                                                                                                              |
| DiSc_F                                                                                                                | Diagnostic for <i>PCK1-HA<sub>6</sub></i>                    | GACGAACATTGTTGGTCCGACAATG                                                                                                             |
| <b>Primers used for amplification of <i>C. albicans</i> and <i>S. cerevisiae</i> <i>ICL1-MYC<sub>3</sub>-URA3</i></b> |                                                              |                                                                                                                                       |
| DS_4F                                                                                                                 | Amplification of <i>CaICL1-MYC<sub>3</sub>-URA3</i> cassette | GCTTGCTAATTTTCATCTTATCCTTTTTTTCTTTTTCACACCCAAATACCTAACCAATTGAGAGAAAAC<br>TCTTAGCATAACATAACAAAAAGTCAACGAAAAATGCCTTACACTCCTATTGAC       |
| DS_4R                                                                                                                 | Amplification of <i>CaICL1-MYC<sub>3</sub>-URA3</i> cassette | CGTACACTCACGGCACTAATGGGCGATACGATACTATGATTGTGTTCCGGGATTAGTTTCGATTCA<br>ATCATTCCGCGCAGGAGGCATGGACAGAAATGTTATAATTGGCCAGTTTTTTTTCAAATAAGC |
| DS_5F                                                                                                                 | Amplification of <i>ScICL1-MYC<sub>3</sub>-URA3</i> cassette | CATTCTTTTTTAATACCCTTTTTCTTTTTCTTTTTCTTTTCTTTCTTTCTTACTTATACTTATACCTTTTATTC<br>TAATATAAATTAA AGAATAAACATTAATAATATC                     |
| DS_5R                                                                                                                 | Amplification of <i>ScICL1-MYC<sub>3</sub>-URA3</i> cassette | CATTACTAGACAGATCATCTCAAATGAATACCGTCTTTTGTTTTTTGTTTATATTATAAGTTCTGTT<br>TCTTTACTAATTTACTTCTATCCTTATAATTGGCCAGTTTTTTTTCAAATAAGC         |
| DCa_F                                                                                                                 | Diagnostic for <i>CaICL1-MYC<sub>3</sub>-URA3</i>            | GGCAAGATAAAGAATGTGGC                                                                                                                  |
| DCa_R                                                                                                                 | Diagnostic for <i>CaICL1-MYC<sub>3</sub>-URA3</i>            | GCTGGATGCTCTCAAGTTTGC                                                                                                                 |
| CaICL1-F                                                                                                              | Diagnostic for <i>CaICL1-MYC<sub>3</sub>-URA3</i>            | CCATCATCTCAACAAGCCG                                                                                                                   |
| CaICL1-R                                                                                                              | Diagnostic for <i>CaICL1-MYC<sub>3</sub>-URA3</i>            | AGTGACACCTTGACCCATAGC                                                                                                                 |
| ScICL1-F                                                                                                              | Diagnostic for <i>ScICL1-MYC<sub>3</sub>-URA3</i>            | GACGCGGGACATTCCCACC                                                                                                                   |
| ScICL1-R                                                                                                              | Diagnostic for <i>ScICL1-MYC<sub>3</sub>-URA3</i>            | GATGCACCACTCATGATGGC                                                                                                                  |
| URA3-F                                                                                                                | Diagnostic for <i>ICL1-MYC<sub>3</sub>-URA3</i>              | CTCATGCCTCACCAGTAGC                                                                                                                   |
| URA3-R                                                                                                                | Diagnostic for <i>ICL1-MYC<sub>3</sub>-URA3</i>              | AGCATTCCAACCAGCATCTC                                                                                                                  |
| HIS-R                                                                                                                 | Diagnostic for <i>CaICL1-HIS1</i>                            | CAAATCGACAATAGCATCAGC                                                                                                                 |

---

**Primers used for addition of ubiquitination site to *C. albicans* ICL1**

---

|            |                                                    |                                                                                                                                 |
|------------|----------------------------------------------------|---------------------------------------------------------------------------------------------------------------------------------|
| DS_6F      | Amplification Of <i>ScUBI-MYC<sub>3</sub>-URA3</i> | GTTTTGTTGAAGATGGTCAGTGGTGGTGTACCTCCACTGCTGCTATGGGTCAAGGTGTCCT<br>GAAGATCAATTCAAAGAAAATGGCGTAAAGAAAATGCATTCACAGCAGATCCTCCTC      |
| DS_6R      | Amplification Of <i>ScUBI-MYC<sub>3</sub>-URA3</i> | CATTACTAGACAGATCATCTCAAATGAATACCGTCTTTTGTGTTTTGTTTATATTATAAGTTCTGTT<br>TCTTTACTAATTTACACTTCTATCCTTATAATTGGCCAGTTTTTTTTCAAATAAGC |
| sCaICL1-F1 | Diagnostic for <i>CaICL1-Ubi</i>                   | TGGTAACTACTCTAACAAAGC                                                                                                           |
| sCaICL1-F2 | Diagnostic for <i>CaICL1-Ubi</i>                   | GCTTTGCCAGATTATGCC                                                                                                              |
| sScICL1-F1 | Diagnostic for <i>CaICL1-Ubi</i>                   | GATCAGCCCTGTCAAATAAGC                                                                                                           |
| sScICL1-F2 | Diagnostic for <i>CaICL1-Ubi</i>                   | CTAACTACCCAGACTTCCAA                                                                                                            |
| ScUBI-R    | Diagnostic for <i>CaICL1-Ubi</i>                   | GCATTTCTTTACGCCATT                                                                                                              |
| URA3-R     | Diagnostic for <i>CaICL1-UBI</i>                   | AGCATTCCAACCAGCATCTC                                                                                                            |

---

**Primers used for qRT-PCR**

---

|          |          |                       |
|----------|----------|-----------------------|
| CaICL1-F | CaICL1-F | CCGGAGATTTAGCTGCTTTG  |
| CaICL1-R | CaICL1-R | GGCAACATCCCAGTTGAAGT  |
| CaPCK1-F | CaPCK1-F | GGGGATAACCGATGTGTTTG  |
| CaPCK1-R | CaPCK1-R | AACTGCCTCGAGAAAGTGGA  |
| CaACT1-F | CaACT1-F | TGCTTTTGGTGTGTTGACGAG |
| CaACT1-R | CaACT1-R | GCAAACCGGCTTTACACAT   |
| ScICL1-F | ScICL1-F | TGGGACGCAATGTTCTATCA  |
| ScICL1-R | ScICL1-R | GCCTTTGGATGAAGGTGTGT  |
| ScPCK1-F | ScPCK1-F | ATCGAAGGTGGTTGTTACGC  |
| ScPCK1-R | ScPCK1-R | GATGAGAGTCCGCCAAACAT  |
| ScACT1-F | ScACT1-F | GGAAAGGCTCATGGCAAATA  |
| ScACT1-R | ScACT1-R | TACCTTGTTGGGTGGCTTTC  |

---
